# Supplementary material for: Aggregation-induced type I&II photosensitivity and photodegradability-based molecular backbones for synergistic antibacterial and cancer phototherapy via photodynamic and photothermal therapies
Source: Royal Society of Chemistry journal article supplement (doi:10.1039/d3mh00688c), 2023-01-01
Supplement: d3mh00688c1.pdf [file d3mh00688c1.pdf]

## SUPPORTING INFORMATION

---

# **Aggregation-induced type I&II photosensitivity and photodegradability-based molecular backbone for synergistic antibacterial and cancer phototherapy via photodynamic and photothermal therapies**

*Jun Liu,<sup>\*a</sup> Hongyu Chen,<sup>a</sup> Yongsheng Yang,<sup>a</sup> Qihui Wang,<sup>b</sup> Shilu Zhang,<sup>a</sup> Bo Zhao,<sup>a</sup> Zhonghui Li, Guoqiang Yang<sup>c</sup> and Guowei Deng<sup>\*b</sup>*

<sup>a</sup> School of pharmacy and Institute of Pharmacy, North Sichuan Medical College, Sichuan, China.

<sup>b</sup> College of Chemistry and Life Science, Sichuan Provincial Key Laboratory for Structural Optimization and Application of Functional Molecules, Chengdu Normal University, Chengdu, 611130, China.

<sup>c</sup> Institute of Chemistry & University of Chinese Academy of Sciences, Chinese Academy of Sciences, Beijing 100190, China.

## Experimental Procedures

### 1. General Information

All chemical reagents were purchased from Beijing InnoChem Science & Technology Co (Beijing, China) and used without further purification. SOSG was purchased from Thermofisher. Absorption spectra were recorded on a Hitachi UV-3010 (Hitachi, Tokyo, Japan) and fluorescence spectra were recorded on Hitachi F7100 (Hitachi, Tokyo, Japan).  $^1\text{H}$  NMR and  $^{13}\text{C}$  NMR spectra were obtained on BrukerAvance III 400 H (400 MHz) spectrometers (Bruker, Karlsruhe, Germany). The HRMS spectra were analyzed on the Q-Exactive instrument. Zetasizer 90 (Malvern, U.K.) was selected to measure the size of the nanoparticles. We used the optical power density meter (LP-3C50, Ophir, CHINA) to calibrate the output power density to  $0.4\text{ W}\cdot\text{cm}^{-2}$ . A thermal imaging camera (226 s, FOTRIC, CHINA) were used to record the temperature rise process. Photoacoustic imaging was performed on multimode photoacoustic imaging system for small animals (Vevo LAZR-X, Fujifilm viualsonic, Canada).

### 2. Synthesis of AID 1-4 (Scheme S1).

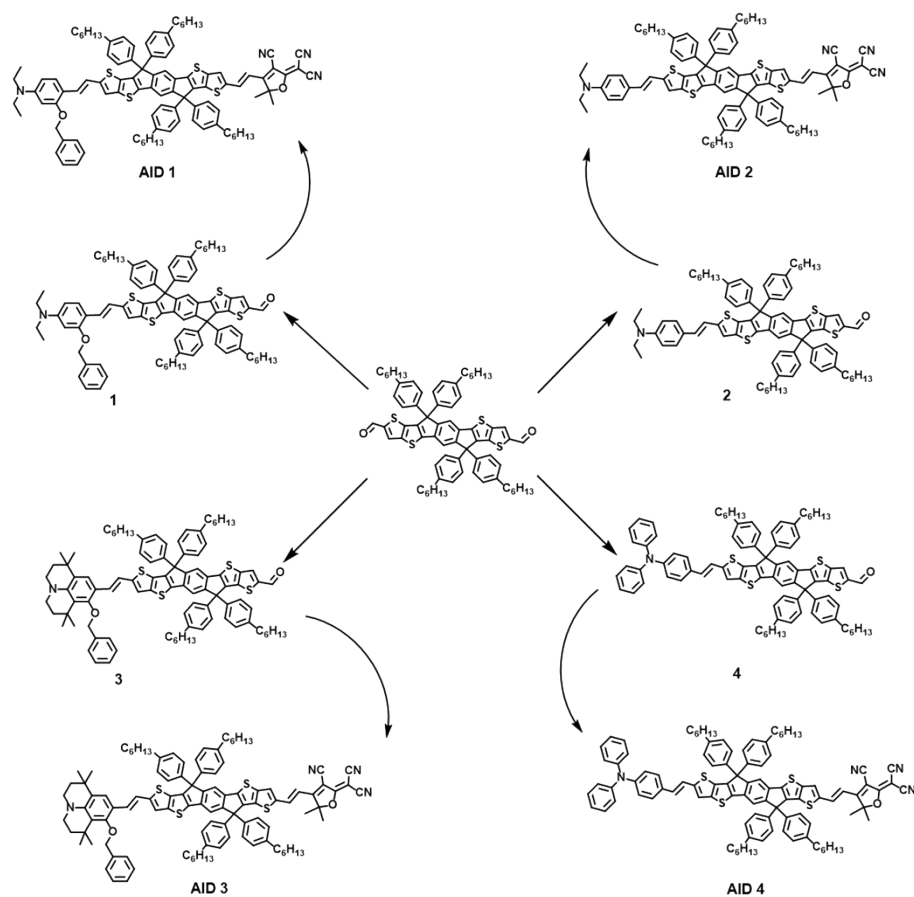

**Scheme S1** the synthetic route of AID 1, AID2, AID3, and AID4.

## SUPPORTING INFORMATION

### *Synthesis of C1*

The benzyloxy substituted aminobenzaldehyde was reduced by NaBH<sub>4</sub>, and then reacted with triphenylphosphine hydrogen bromide to provide the phosphonate. Next, the obtained phosphonate (61mg, 0.1mmol) and IDT-2CHO (108mg, 0.1mmol) were dissolved in 5 mL 1,2-dichloroethane, and NaH (12mg, 0.5mmol) was added to the solution slowly at 0 °C. The react mixture was stirred at room temperature for another 3 h. After poured into H<sub>2</sub>O, the mixture was extracted by dichloromethane and dried over anhydrous Na<sub>2</sub>SO<sub>4</sub>. The solvent was removed by rotary evaporator, and the crude product was purified through column chromatography, and C1 was obtained as organic powder (yield: 60%). <sup>1</sup>H NMR (600 MHz, CDCl<sub>3</sub>) δ 9.87 (s, 1H), 7.92 (s, 1H), 7.55 (s, 1H), 7.53 – 7.45 (m, 3H), 7.38 (t, J = 7.3 Hz, 2H), 7.33 (d, J = 6.6 Hz, 2H), 7.24 – 7.00 (m, 19H), 6.28 (d, J = 6.9 Hz, 1H), 6.17 (s, 1H), 5.15 (s, 2H), 3.29 (s, 4H), 2.65 – 2.48 (m, 8H), 1.67 – 1.53 (m, 8H), 1.36 – 1.25 (m, 24H), 1.11 (s, 6H), 0.94 – 0.79 (m, 12H). <sup>13</sup>C NMR (151 MHz, CDCl<sub>3</sub>) δ 182.77, 154.46, 153.62, 150.36, 145.61, 143.83, 142.13, 141.88, 140.47, 139.98, 139.52, 129.89, 128.73, 128.66, 128.61, 128.50, 128.19, 128.07, 127.89, 127.84, 127.17, 117.84, 104.96, 96.99, 63.04, 62.88, 44.56, 35.62, 35.58, 31.70, 31.27, 31.26, 29.20, 29.14, 22.58, 14.09. HRMS : cal for [M<sup>+</sup>] C<sub>88</sub>H<sub>95</sub>NO<sub>2</sub>S<sub>4</sub> :1325.6246, found: 1325.6239.

### *Synthesis of AID1*

C1(66mg, 0.05mmol), TCF (13mg, 0.065mmol) and one drop of triethylamine were dissolved in 3 mL chloroform, and the reaction was refluxed for 5h. After removed the solvent, the crude product was purified through column chromatography, and AID1 was obtained as green powder (yield: 40%). <sup>1</sup>H NMR (400 MHz, CD<sub>2</sub>Cl<sub>2</sub>) δ 7.90 (d, J = 15.7 Hz, 1H), 7.74 (s, 1H), 7.65 (s, 1H), 7.57 (s, 1H), 7.52 (d, J = 7.1 Hz, 1H), 7.42 (t, J = 7.3 Hz, 1H), 7.37 (dd, J = 7.9, 3.7 Hz, 1H), 7.18 (tt, J = 18.6, 9.2 Hz, 1H), 6.66 (d, J = 15.7 Hz, 1H), 6.32 (dd, J = 8.8, 1.8 Hz, 1H), 6.21 (s, 1H), 5.36 (s, 1H), 3.36 (q, J = 6.9 Hz, 1H), 2.64 – 2.58 (m, 1H), 1.77 (s, 1H), 1.31 (dd, J = 15.0, 8.6 Hz, 2H), 1.15 (t, J = 7.0 Hz, 1H), 0.90 (dd, J = 7.7, 5.1 Hz, 1H). <sup>13</sup>C NMR (101 MHz, CD<sub>2</sub>Cl<sub>2</sub>) δ 175.90, 173.02, 157.67, 154.89, 153.83, 151.21, 148.85, 147.97, 147.68, 146.08, 143.39, 143.35, 142.48, 142.21, 141.61, 141.00, 140.07, 139.78, 139.40, 139.27, 138.32, 137.61, 134.30, 130.82, 129.11, 128.74, 128.55, 128.03, 127.93, 127.78, 127.18, 124.65, 117.92, 117.71, 117.22, 116.64, 113.37, 112.23, 111.97, 111.61, 111.04, 104.95, 97.33, 96.76, 96.52, 70.51, 62.94, 62.87, 44.52, 35.50, 31.68, 31.40, 29.68, 29.14, 26.22, 22.57, 13.83, 12.41. HRMS : cal for [M+H<sup>+</sup>] C<sub>99</sub>H<sub>103</sub>N<sub>4</sub>O<sub>2</sub>S<sub>4</sub> :1507.6958, found: 1507.6969.

### *Synthesis of AID2-4*

Using benzyloxy substituted 1,1,7,7-tetramethyljulolidine-9-carboxaldehyde, 4-(dimethylamino)-benzaldehyde, 4-(diphenylamino) benzaldehyde as the raw materials to prepared the phosphonates repectively, the AID2-4 was synthesized according to the similar procedure as AID1.

AID2: <sup>1</sup>H NMR (400 MHz, CD<sub>2</sub>Cl<sub>2</sub>) δ 7.90 (d, J = 15.7 Hz, 1H), 7.74 (s, 1H), 7.63 (s, 1H), 7.56 (t, J

## SUPPORTING INFORMATION

= 3.6 Hz, 3H), 7.34 (s, 1H), 7.30 (d, J = 7.2 Hz, 1H), 7.29 (d, J = 7.7 Hz, 1H), 7.24 – 7.12 (m, 17H), 7.09 (s, 1H), 7.04 (s, 1H), 7.04 (s, 1H), 6.66 (d, J = 15.7 Hz, 1H), 4.95 (s, 2H), 3.26 – 3.21 (m, 2H), 3.17 (s, 2H), 2.61 (t, J = 7.7 Hz, 8H), 1.83-1.74 (m, 10H), 1.51 (s, 6H), 1.38 (s, 6H), 1.37-1.25 (m, 32H), 0.93 – 0.85 (m, 12H). <sup>13</sup>C NMR (101 MHz, CD<sub>2</sub>Cl<sub>2</sub>) δ 175.78, 173.02, 155.89, 154.80, 153.83, 147.61, 146.10, 143.35, 143.25, 143.19, 142.47, 142.19, 141.01, 140.01, 139.75, 139.37, 139.26, 138.24, 137.89, 134.34, 130.98, 129.04, 128.74, 128.54, 128.43, 127.92, 127.77, 127.62, 127.33, 127.02, 125.33, 124.72, 123.90, 122.57, 122.48, 117.93, 117.57, 117.48, 116.98, 116.67, 112.20, 111.99, 111.58, 111.01, 97.30, 96.58, 76.25, 62.95, 35.50, 35.47, 32.76, 32.21, 31.67, 31.42, 31.36, 31.12, 31.02, 30.33, 29.94, 29.67, 29.15, 29.09, 26.22, 22.56, 13.81. HRMS: cal for [M+H<sup>+</sup>] C<sub>105</sub>H<sub>111</sub>N<sub>4</sub>O<sub>2</sub>S<sub>4</sub> :1587.7584, found: 1587.7585.

AID3: <sup>1</sup>H NMR (600 MHz, CDCl<sub>3</sub>) δ 7.77 (d, J = 15.6 Hz, 1H), 7.56 (s, 1H), 7.48 (s, 1H), 7.41 (s, 1H), 7.26 (d, J = 8.0 Hz, 2H), 7.17 (s, 1H), 7.14 – 7.01 (m, 16H), 6.93 (d, J = 15.8 Hz, 1H), 6.75 (d, J = 15.8 Hz, 1H), 6.57 (s, 2H), 6.47 (d, J = 15.6 Hz, 1H), 2.92 (s, 6H), 2.49 (m, 8H), 1.65 (s, 6H), 1.33 – 1.12 (m, 32H), 0.86 – 0.70 (m, 12H). <sup>13</sup>C NMR (150 MHz, CDCl<sub>3</sub>) δ 175.69, 172.63, 154.87, 153.88, 151.69, 147.68, 146.12, 143.13, 143.05, 142.34, 141.99, 140.80, 140.09, 139.88, 139.82, 139.26, 138.53, 134.33, 129.11, 128.75, 128.54, 128.03, 127.84, 127.58, 117.99, 116.78, 112.19, 111.50, 111.41, 111.05, 96.92, 96.16, 62.92, 62.87, 35.59, 31.70, 31.69, 31.26, 29.70, 29.17, 26.50, 22.58, 14.09. HRMS: m/z calcd for [M+H]<sup>+</sup> C<sub>90</sub>H<sub>93</sub>N<sub>4</sub>O<sub>4</sub>S<sub>4</sub>: 1374.6258, found: 1374.6225

AID4: <sup>1</sup>H NMR (400 MHz, CD<sub>2</sub>Cl<sub>2</sub>) δ 7.90 (d, J = 15.7 Hz, 1H), 7.74 (s, 1H), 7.66 (s, 1H), 7.62 – 7.55 (m, 1H), 7.36 (d, J = 8.7 Hz, 2H), 7.34 – 7.31 (m, 2H), 7.31 – 7.29 (m, 2H), 7.27 (s, 1H), 7.23 – 7.10 (m, 21H), 7.10 – 7.06 (m, 2H), 7.04 (d, J = 8.7 Hz, 2H), 6.88 (d, J = 16.0 Hz, 1H), 6.65 (d, J = 11.9, 1H), 2.66-2.56 (m, 8H), 1.77 (s, 6H), 1.42 – 1.25 (m, 32H), 0.92-0.84 (m, 12H). <sup>13</sup>C NMR (101 MHz, CD<sub>2</sub>Cl<sub>2</sub>) δ 175.84, 172.98, 154.89, 153.96, 150.98, 147.64, 147.52, 147.39, 146.23, 145.81, 143.41, 143.15, 142.68, 142.50, 142.28, 141.09, 140.01, 139.67, 139.31, 139.23, 138.05, 134.64, 131.74, 130.53, 129.28, 129.12, 129.02, 128.75, 128.58, 128.09, 127.90, 127.77, 127.18, 124.69, 123.85, 123.26, 123.05, 122.48, 120.32, 118.98, 117.93, 116.86, 112.18, 112.08, 111.56, 110.99, 97.32, 96.69, 62.97, 62.92, 55.94, 35.48, 31.67, 31.37, 29.10, 26.21, 22.56, 13.81. HRMS: cal for [M+H<sup>+</sup>] C<sub>100</sub>H<sub>97</sub>N<sub>4</sub>O<sub>4</sub>S<sub>4</sub> :1497.6540, found: 1497.6515.

### 3. Preparation of Nanoparticles

0.1 mmol of AID1 (1.5mg), AID2 (1.59mg), AID3 (1.40mg), and AID4 (1.49mg) were respectively dissolved in 0.1 mL of acetone solution, which was poured into 1 mL of DD water under sonication (12 W). The resulted dispersion was further kept in sonication (12 W) for 5 min. The mixture was stirred in fume hood for two days.

## SUPPORTING INFORMATION

---

### 4. Total ROS Detection by DCFH

The DMSO solution of H<sub>2</sub>DCF-DA (2.0 mM, 20  $\mu$ L) was activated by sodium hydroxide solution (0.01 M, 160  $\mu$ L) and allowed to sit at room temperature for 30 min, which was added to 810  $\mu$ L water and 10  $\mu$ L NPs. The fluorescence signal was monitored after the solution was irradiated by 660 laser (0.4 W/cm<sup>2</sup>) and the fluorescence spectra were recorded with the excitation wavelength at 480 nm. Control group were prepared by replacing NPs with 10  $\mu$ L water.

### 5. Detection of <sup>1</sup>O<sub>2</sub> Generation by SOSG

<sup>1</sup>O<sub>2</sub> generation in solution under normoxic condition were monitored with SOSG as fluorescence probe. Briefly, 10  $\mu$ L SOSG in methanol (1 mM) was mixed with the AID1, AID2, AID3 and AID4 NPs water solution (working concentration: 10  $\mu$ M) and irradiated by 660 nm laser (0.4 W cm<sup>-2</sup>). Then, the fluorescence intensities at 530 nm for every 10s were recorded in a fluorescence spectrofluorometer (Excitation wavelength: 480nm). The <sup>1</sup>O<sub>2</sub> generation of AID4 NPs in solution under hypoxic condition was first bubbling with N<sub>2</sub> for 1h and then measure under N<sub>2</sub> protection.

### 6. Detection of •OH Generation by APF

Aminophenyl fluorescein (APF) was used as fluorescence probe for detection of •OH in solution. 10  $\mu$ M AID1, AID2, AID3, and AID4 NPs were dissolved in 1 mL water containing 10  $\mu$ M of APF. The mixture was then placed in a cuvette and irradiated by 660 nm laser (0.4 W cm<sup>-2</sup>). The fluorescence change of sample at 515 nm was recorded by fluorescence spectrofluorometer (Excitation wavelength: 490 nm). The •OH generation of AID4 NPs in solution under hypoxic condition was first bubbling with N<sub>2</sub> for 1h and then measure under N<sub>2</sub> protection.

### 7. Detection of O<sub>2</sub><sup>•-</sup> Generation by DHR123

Dihydrorhodamine 123 (DHR123) was used as fluorescence probe for detection of O<sub>2</sub><sup>•-</sup> in solution. 10  $\mu$ M AID1, AID2, AID3, and AID4 NPs were dissolved in 1 mL water containing 60  $\mu$ M of DHR 123. The mixture was then placed in a cuvette and irradiated by 660 nm laser (0.4 W cm<sup>-2</sup>). The fluorescence change of sample at 530 nm was recorded by fluorescence spectrofluorometer (Excitation wavelength: 480 nm). The O<sub>2</sub><sup>•-</sup> generation of AID4 NPs in solution under hypoxic condition was first bubbling with N<sub>2</sub> for 1h and then measure under N<sub>2</sub> protection.

### 8. Cell culture, viability and imaging

4T1 cells were cultured Dul-becco's Modified Eagle Medium (DMEM) and 10% fetal bovine serum

## SUPPORTING INFORMATION

(FBS). The cells were plated on glass bottomed dishes at 37 °C under 5% CO<sub>2</sub> atmosphere before experiments.

The cytotoxicity of these towards 4T1 cells was assessed by kit of CCK-8. Cells were seeded into a 96-well plate and treated with various NPs at different concentrations for 24 h. CCK-8 solution (10 μL) were added to each well, and then incubated for 2 h. The absorbance at 450 nm was recorded by microplate reader. The cell viability was determined by the formula as follows. Cell viability =  $(OD_{\text{positive}} - OD_{\text{control}}) / (OD_{\text{negative}} - OD_{\text{control}})$ . Their phototoxicity was also tested by a similar procedure, but before adding CCK8, these NPs outside the cells were washed away and exposed to white light (0.5 mW/cm<sup>2</sup>) for 10 minutes. All the experiments were repeated three times.

4T1 cells in confocal culture dishes were preloaded with these NPs. Then, the cells were treated with H<sub>2</sub>DCF-DA (5 μM) aqueous solution and incubated for 30 min in darkness in a 37°C cell incubator. Next, the cells were irradiated by the white light (1.5 mW/cm<sup>2</sup>). Detection of H<sub>2</sub>DCF-DA fluorescence was visualized by confocal microscope. H<sub>2</sub>DCF-DA was excited by a 488 nm laser, and fluorescence emission at 490-530 nm was recorded by confocal laser scanning microscopy using oil objective.

### 9. Photothermal properties tests in vitro

The solution of AID1, AID2, AID3 and AID4 NPs with different concentrations were irradiated by 660 nm laser (0.4 W cm<sup>-2</sup>). The temperature changes were monitored by a IR camera.

### 10. Photodynamic and photothermal antibacterial effects

Suspensions of bacteria (2 μL, 10<sup>9</sup> estimated by McFarland Standards) in a final volume of 100 μL containing 100 μmol AID 1-4 NPs were in dark or irradiated 660 nm laser for 5 min (0.4 W cm<sup>-2</sup>), respectively. Then, the bacterial suspensions were diluted 1 × 10<sup>5</sup> fold with PBS. The diluted bacterial sample (100 μL) was spread on a solid LB agar plate, and take a picture of colonies formed after 24 h of incubation at 37 °C was counted.

### 11. Theoretical Calculation

All calculations were performed using the Gaussian 09 program package. The geometries of AID1, AID2, AID3 and AID4 were optimized using DFT/B3LYP/6-311G(d). The excitation energies for the singlet were predicted using TD-DFT/B3LYP/6-311G(d) based on the optimized structure in gaseous phase. The molecular orbital density is output through free software-multiwfn.<sup>1</sup>

### 12. Animals and Tumor-Bearing Mouse Model

## SUPPORTING INFORMATION

---

Nude mice 6-7 weeks old were provided by the Laboratory Animal Center of North Sichuan Medical College, Nanchong, China. All procedures involving animals were performed according to a protocol approved by the Institutional Animal Care and Treatment Committee of North Sichuan Medical College. These nude mice were subcutaneously injected with  $1 \times 10^6$  4T1 cells in the right anterior axillary under aseptic conditions. Then, they were individually housed under specific pathogenfree conditions with free access to food and water until the formed tumor grew to approximately 1 cm in diameter by measuring with a caliper; tumor growth to this size took about one week. These tumor-bearing mice were further used to conduct photodynamic and photothermal experiments.

### 13. Photodynamic and photothermal antitumor effects

The 4T1 tumor bearing mice were randomly divided into 6 groups ( $n = 3$  for each groups), which were named “PBS + Laser”, “AID1 NPs + Laser”, “AID2 NPs + Laser”, “AID3 NPs + Laser” and “AID4 NPs + Laser”, respectively. 200  $\mu\text{L}$  of PBS, “AID1 NPs (200 $\mu\text{M}$ )”, “AID2 NPs (200 $\mu\text{M}$ )”, “AID3 NPs (200 $\mu\text{M}$ )” and “AID4 NPs (200 $\mu\text{M}$ )”, were intravenously injected into the mice, respectively. The mice were irradiated by 660 nm laser ( $0.4 \text{ W cm}^{-2}$ ) for 10 min post-injection, respectively. In addition, the infrared thermal images of mice were acquired by using IR camera during the irradiation of 660 nm laser ( $0.4 \text{ W} \cdot \text{cm}^{-2}$ ). The tumor volumes and body weight were measured every day for 8 days. Tumor volumes were measured every other day using a caliper and calculated using the following formula:  $\text{volume} = ((\text{tumor length}) \times (\text{tumor width})^2) / 2$ . The long term survival rate was also studied by comparing the survival rate between tumor model mice receiving phototherapy in the presence of AID4 NPs and in the absence of AID4 NPs by preparing 10 mice for each group.

## SUPPORTING INFORMATION

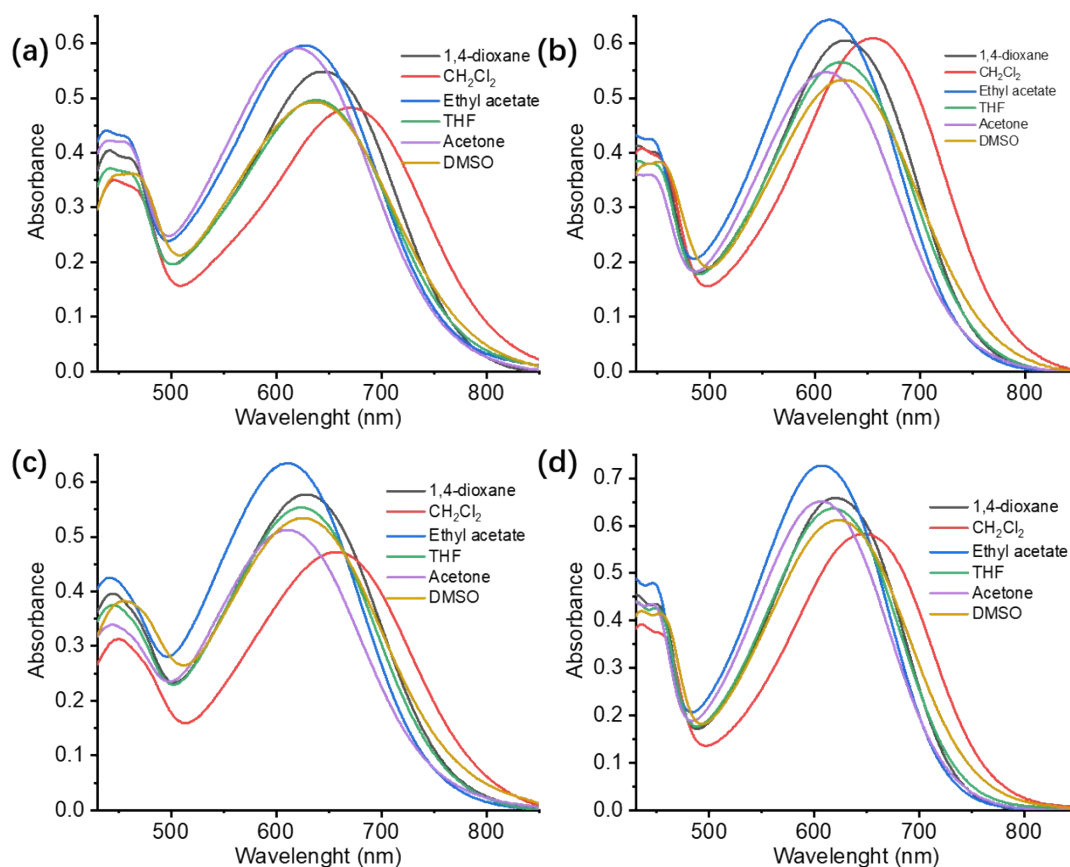

**Figure S1.** UV-vis absorption spectra of 10  $\mu\text{M}$  (a) AID1, (d) AID2, (c) AID3 and (d) AID4 in various organic solvents.

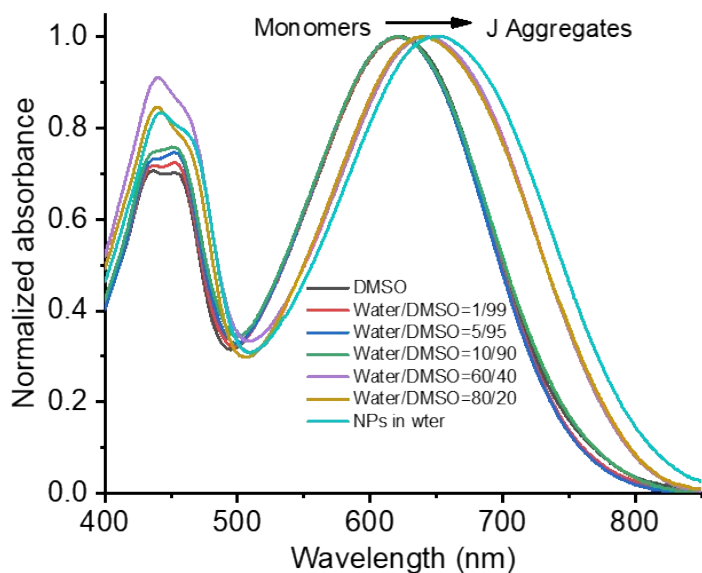

**Figure S2.** UV absorption of AID4 in different ratios of DMSO and water.



## SUPPORTING INFORMATION

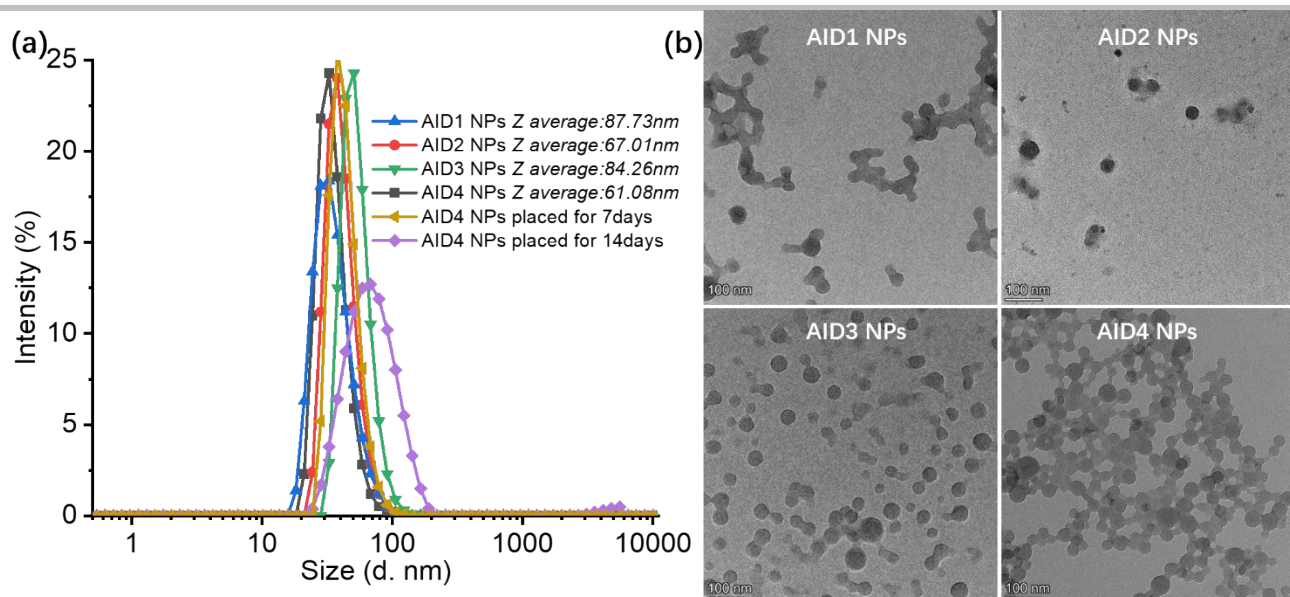

**Figure S3.** Size distribution of AID1 NPs, AID2 NPs, AID3 NPs and AID4 NPs measured by DLS in water. TEM image of AID1 NPs, AID2 NPs, AID3 NPs and AID4 NPs.

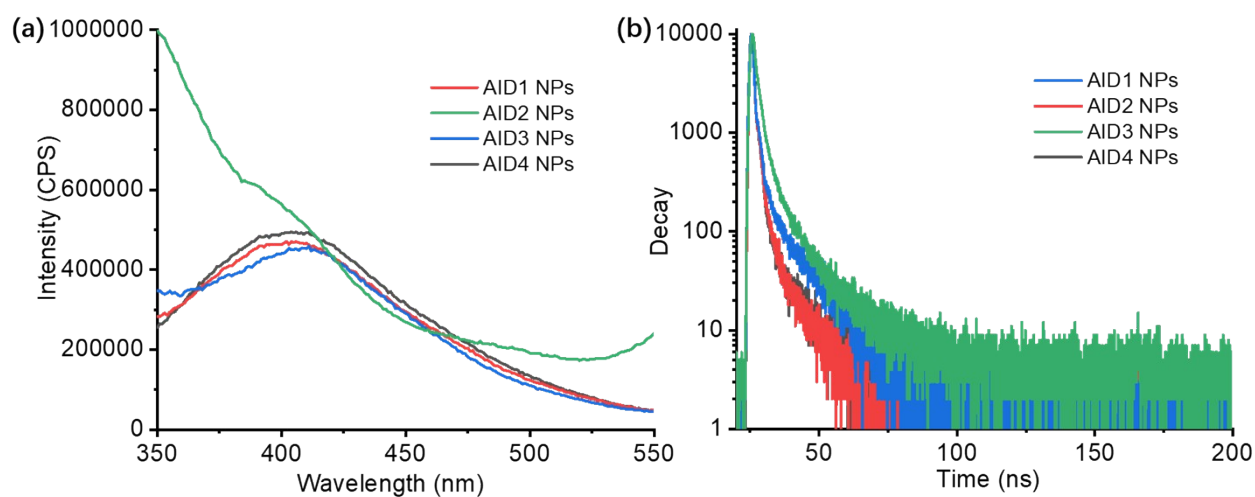

**Figure S4.** (a) phosphorescence spectrum and (b) phosphorescence lifetime of AID 1-4 NPs; Excitation wavelength: 350nm.

**Table S1.** The quantum yield of AID1 NPs, AID2 NPs, AID3 NPs and AID4 NPs.

|               | AID1 NPs        | AID2 NPs        | AID3 NPs        | AID4 NPs        |
|---------------|-----------------|-----------------|-----------------|-----------------|
| Quantum yield | $0.04 \pm 0.02$ | $0.03 \pm 0.02$ | $0.04 \pm 0.02$ | $0.05 \pm 0.02$ |

## SUPPORTING INFORMATION

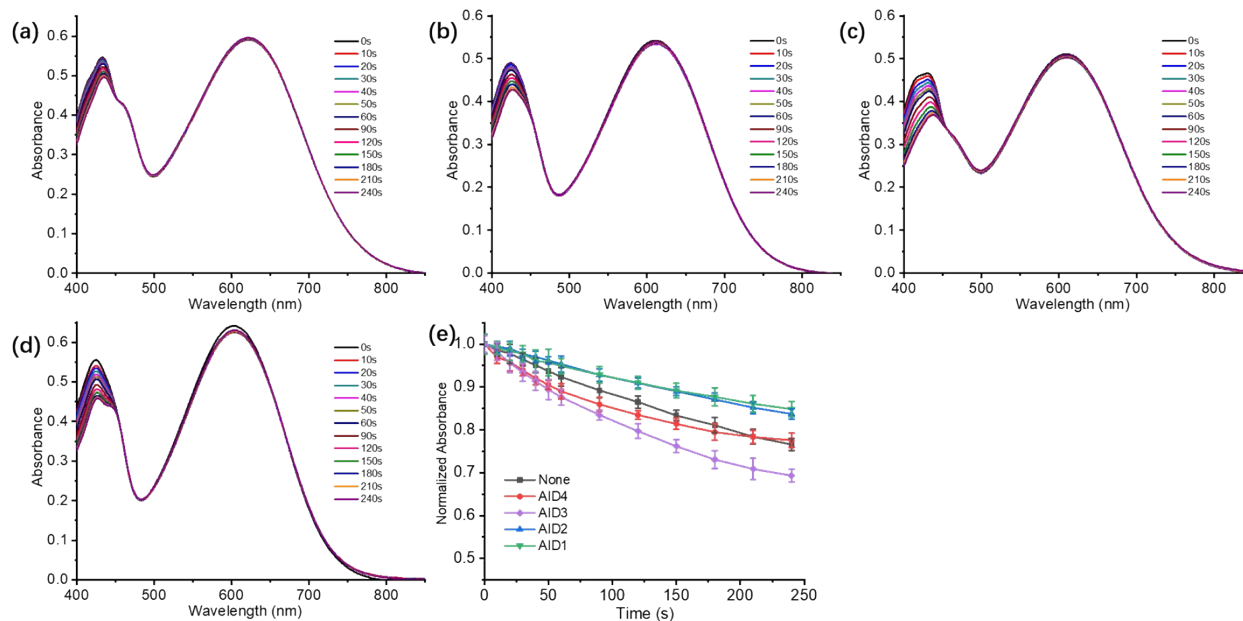

**Figure S5.** UV-vis absorption spectra of 10  $\mu\text{M}$  (a) AID1, (b) AID2, (c) AID3 and (d) AID4 containing 10  $\mu\text{M}$  DPBF in acetone after 660 nm laser irradiation ( $0.4 \text{ W/cm}^2$ ) for different time. (e) a correlation between the absorption value at 415nm and irradiation time using 660nm laser ( $0.4 \text{ W/cm}^2$ ) containing 10  $\mu\text{M}$  AID 1-4 and 10  $\mu\text{M}$  DPBF in acetone.

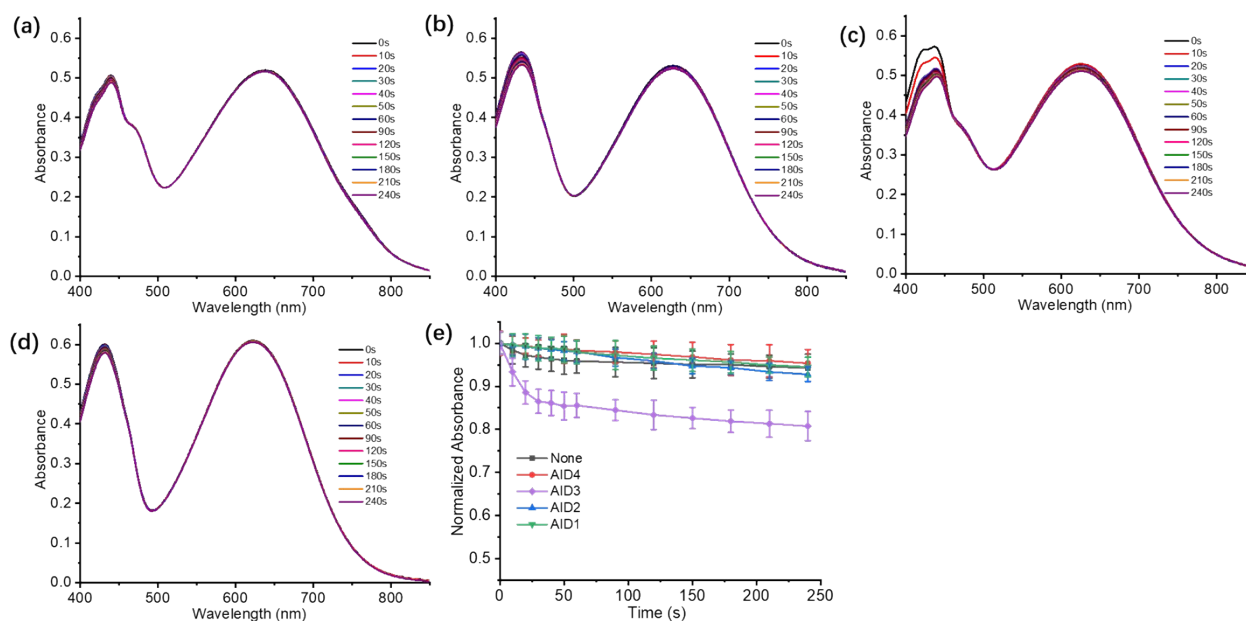

**Figure S6.** UV-vis absorption spectra of 10  $\mu\text{M}$  (a) AID1, (b) AID2, (c) AID3 and (d) AID4 containing 10  $\mu\text{M}$  DPBF in DMSO after 660 nm laser irradiation ( $0.4 \text{ W/cm}^2$ ) for different time. (e) a correlation between the absorption value at 415nm and irradiation time using 660nm laser ( $0.4 \text{ W/cm}^2$ ) containing 10  $\mu\text{M}$  AID 1-4 and 10  $\mu\text{M}$  DPBF in DMSO.

## SUPPORTING INFORMATION

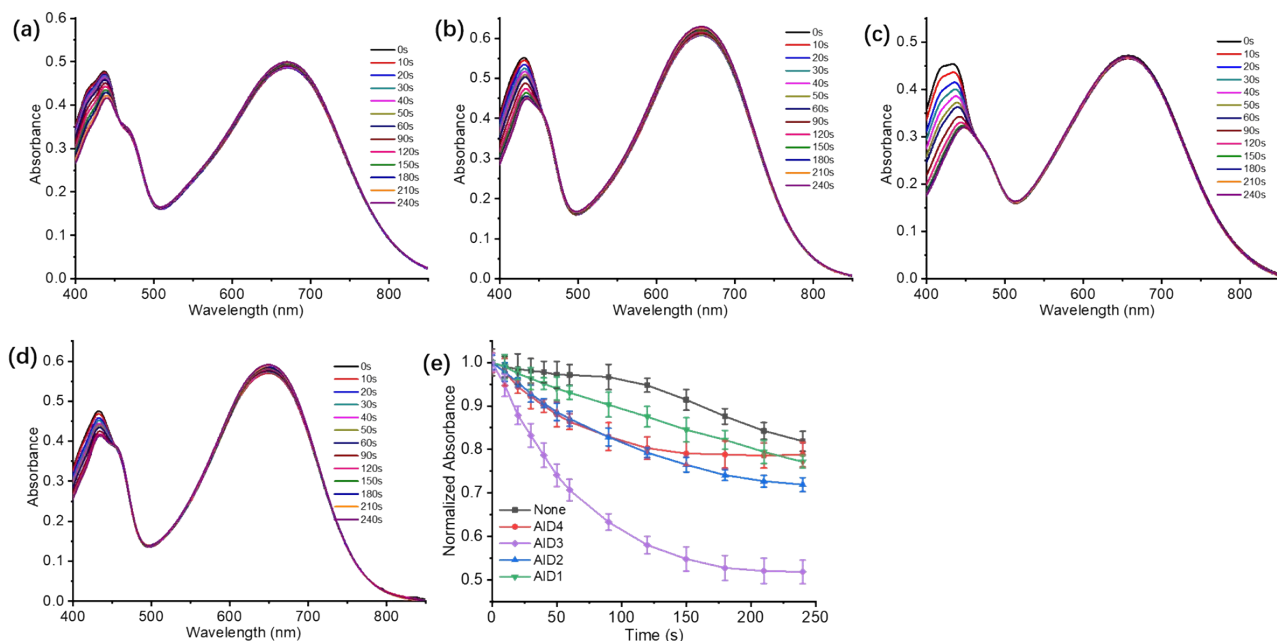

**Figure S7.** UV-vis absorption spectra of 10  $\mu\text{M}$  (a) AID1, (b) AID2, (c) AID3 and (d) AID4 containing 10  $\mu\text{M}$  DPBF in  $\text{CH}_2\text{Cl}_2$  after 660 nm laser irradiation ( $0.4 \text{ W/cm}^2$ ) for different time. (e) a correlation between the absorption value at 415nm and irradiation time using 660nm laser ( $0.4 \text{ W/cm}^2$ ) containing 10  $\mu\text{M}$  AID 1-4 and 10  $\mu\text{M}$  DPBF in  $\text{CH}_2\text{Cl}_2$ .

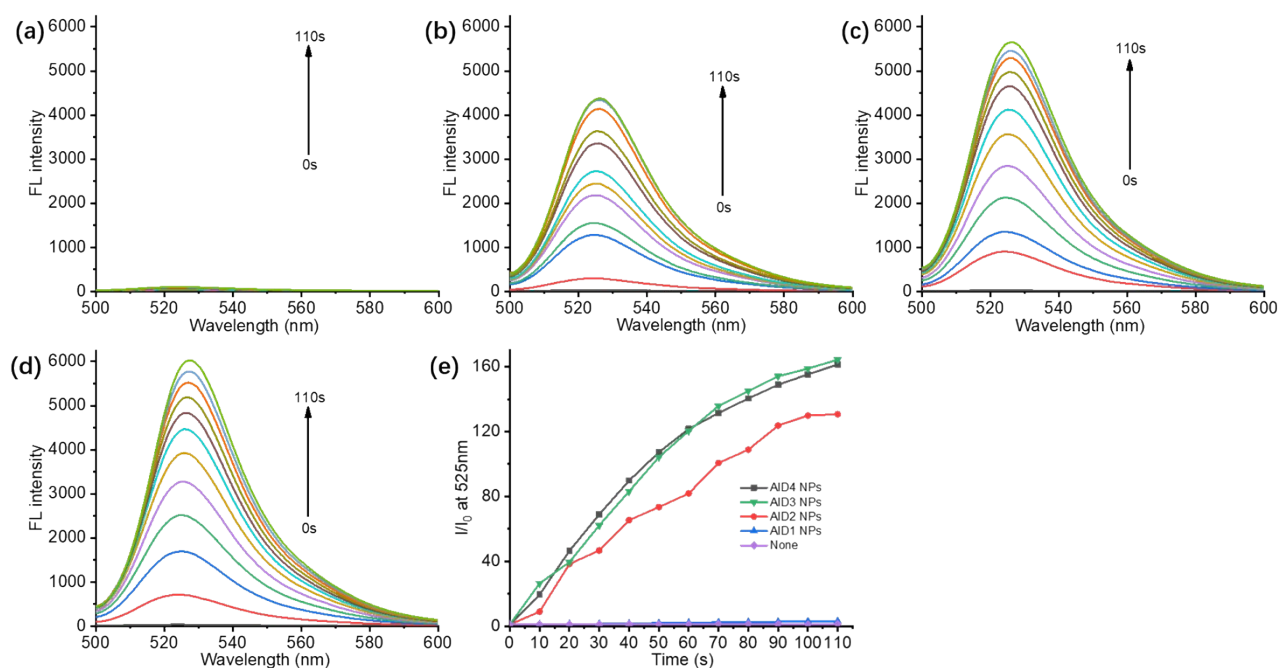

**Figure S8.** Fluorescence spectra changes of DCFH for total ROS detection. (a) AID1 NPs, (b) AID2 NPs, (c) AID3 NPs and (d) AID4 NPs (10  $\mu\text{M}$ ) with increasing irradiation time upon 660 nm laser irradiation ( $0.4 \text{ W cm}^{-2}$ ). (e) a correlation between the fluorescence ( $I/I_0$ ) at 525nm and irradiation time using 660nm laser ( $0.4 \text{ W/cm}^2$ ) by using DCFH as a fluorescence probe for ROS.

## SUPPORTING INFORMATION

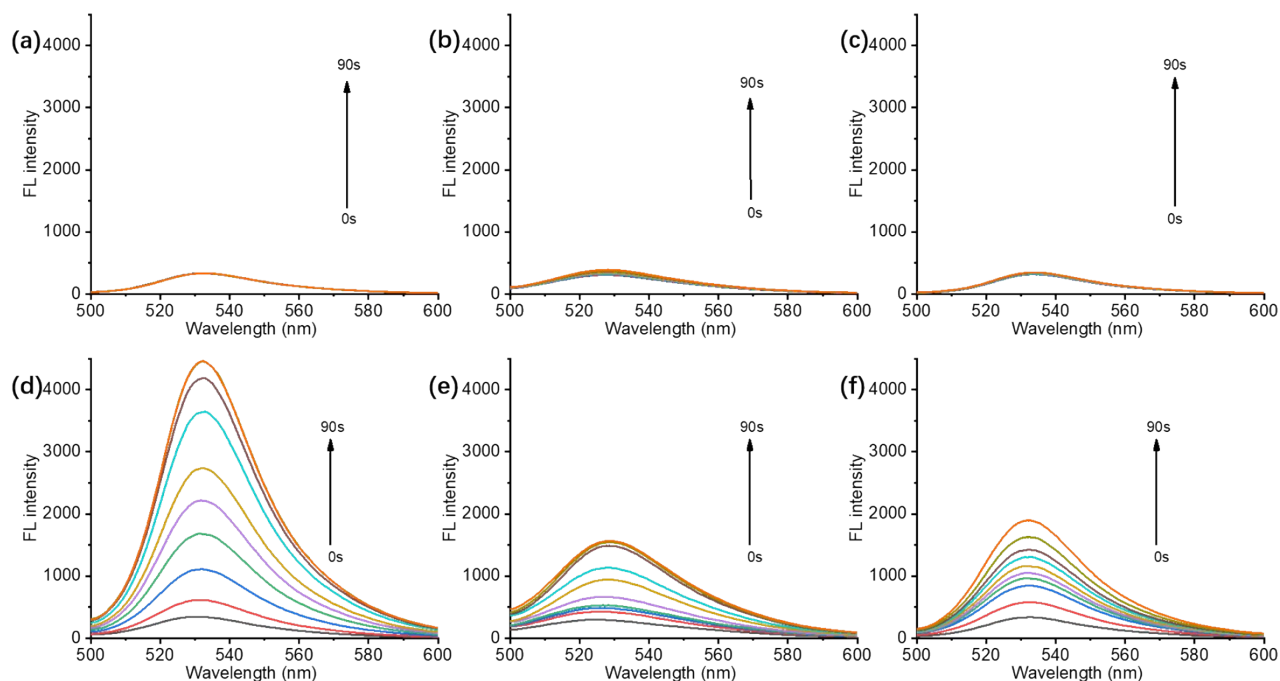

**Figure S9.** Fluorescence spectra changes of Singlet Oxygen Sensor Green (SOSG) for  $^1\text{O}_2$  detection.. (a) AID1 NPs( $10\ \mu\text{M}$ ), (b) AID2 NPs( $10\ \mu\text{M}$ ), (c) AID3 NPs( $10\ \mu\text{M}$ ), (d) AID4 NPs ( $10\ \mu\text{M}$ ), (e) MB ( $10\ \mu\text{M}$ ) and (f) AID4 NPs( $10\ \mu\text{M}$ ) under hypoxic environment with increasing irradiation time upon 660 nm laser irradiation ( $0.4\ \text{W cm}^{-2}$ ).

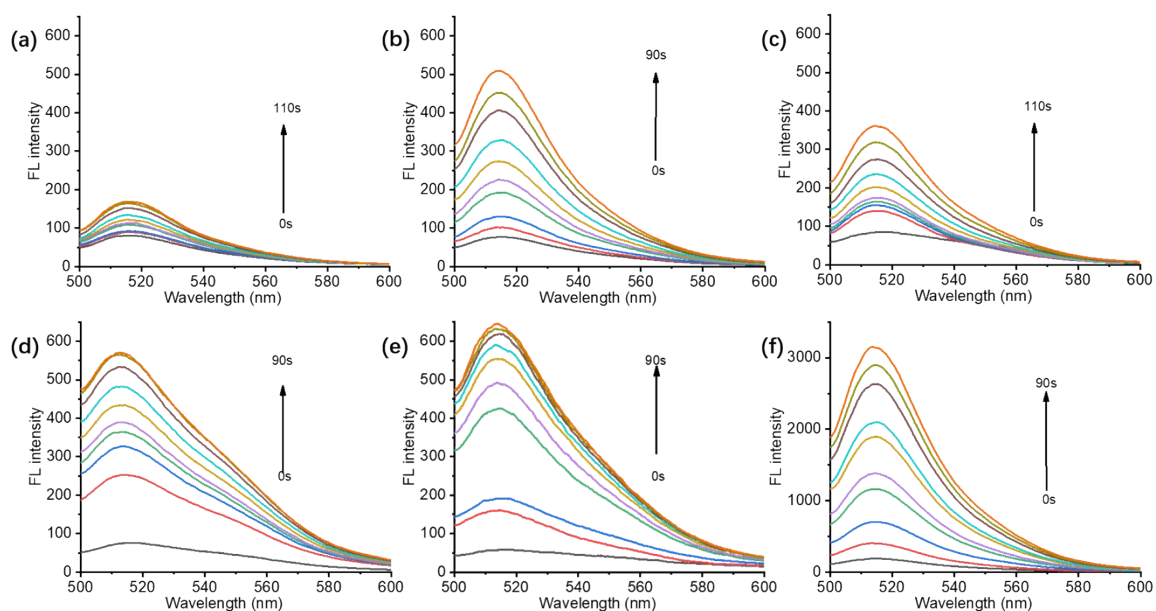

**Figure S10.** Fluorescence spectra changes of APF for  $\bullet\text{OH}$  detection. (a) AID1 NPs( $10\ \mu\text{M}$ ), (b) AID2 NPs( $10\ \mu\text{M}$ ), (c) AID3 NPs( $10\ \mu\text{M}$ ), (d) AID4 NPs ( $10\ \mu\text{M}$ ), (e) MB ( $10\ \mu\text{M}$ ) and (f) AID4 NPs( $10\ \mu\text{M}$ ) under hypoxic environment with increasing irradiation time upon 660 nm laser irradiation ( $0.4\ \text{W cm}^{-2}$ ).

## SUPPORTING INFORMATION

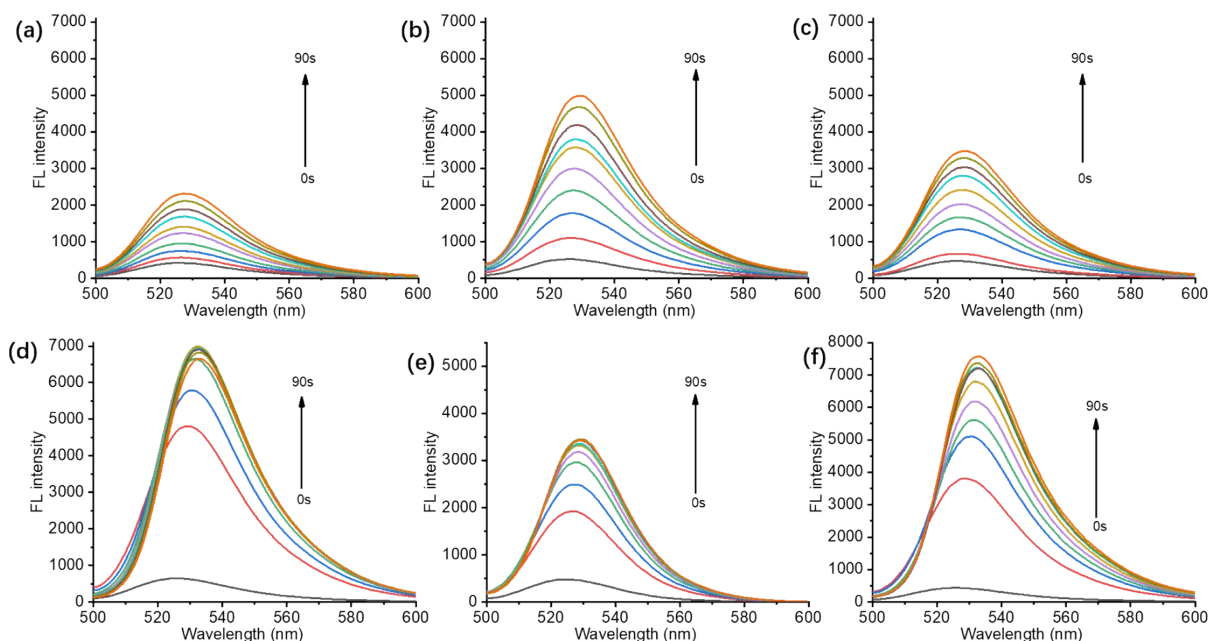

**Figure S11.** Fluorescence spectra changes of DHR123 for  $O_2^{\cdot-}$  detection. (a) AID1 NPs(10  $\mu$ M), (b) AID2 NPs(10  $\mu$ M), (c) AID3 NPs(10  $\mu$ M) , (d) AID4 NPs (10  $\mu$ M), (e) MB (10  $\mu$ M) and (f) AID4 NPs(10  $\mu$ M) under hypoxic environment with increasing irradiation time upon 660 nm laser irradiation ( $0.4 \text{ W cm}^{-2}$ ).

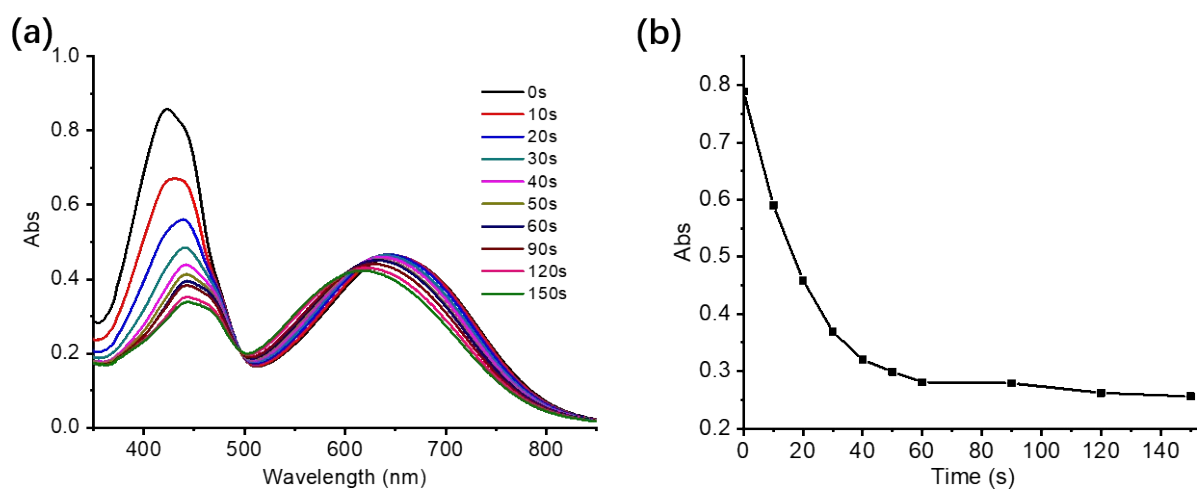

**Figure S12.** (a) UV-vis absorption spectra of 10  $\mu$ M AID4 NPs containing 10  $\mu$ M DPBF in water after 660 nm laser irradiation ( $0.4 \text{ W/cm}^2$ ) for different time. (b) a correlation between the absorption value at 415nm and irradiation time.

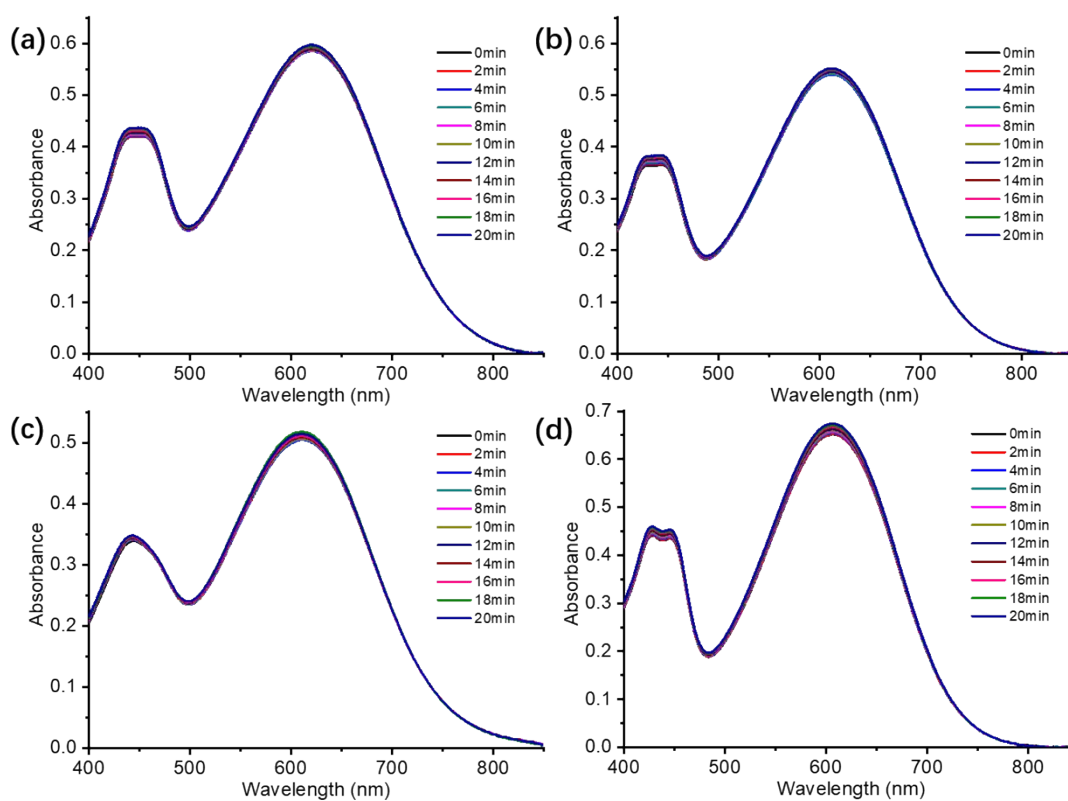

**Figure S13.** UV-vis absorption spectra of 10  $\mu\text{M}$  (a) AID1, (d) AID2, (c) AID3 and (d) AID4 in acetone after 660 nm laser irradiation ( $0.4 \text{ W/cm}^2$ ) with different time.

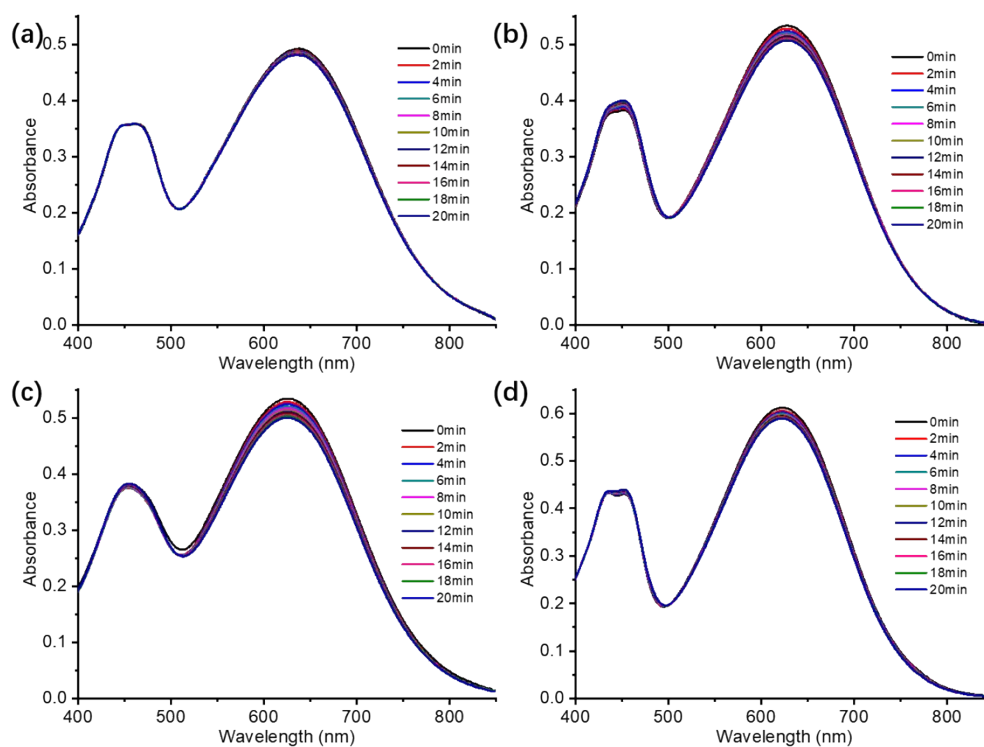

**Figure S14.** UV-vis absorption spectra of 10  $\mu\text{M}$  (a) AID1, (d) AID2, (c) AID3 and (d) AID4 in DMSO after 660 nm laser irradiation ( $0.4 \text{ W/cm}^2$ ) with different time.

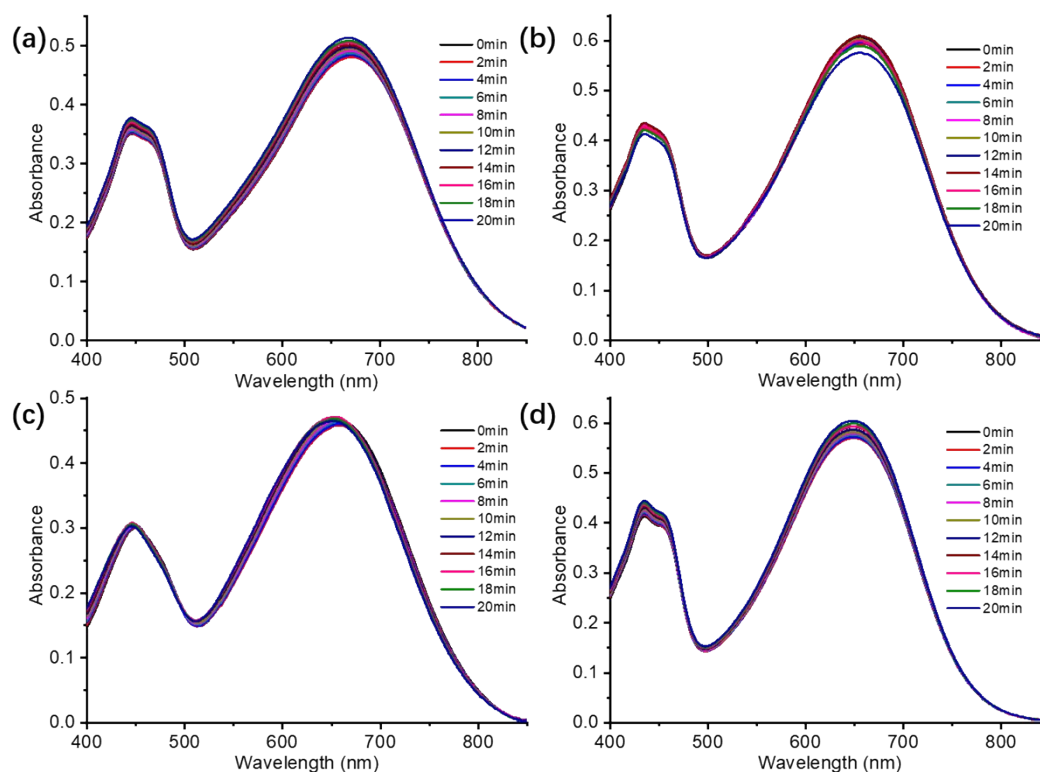

**Figure S15.** UV-vis absorption spectra of 10  $\mu\text{M}$  (a) AID1, (d) AID2, (c) AID3 and (d) AID4 in  $\text{CH}_2\text{Cl}_2$  after 660 nm laser irradiation ( $0.4 \text{ W/cm}^2$ ) with different time.

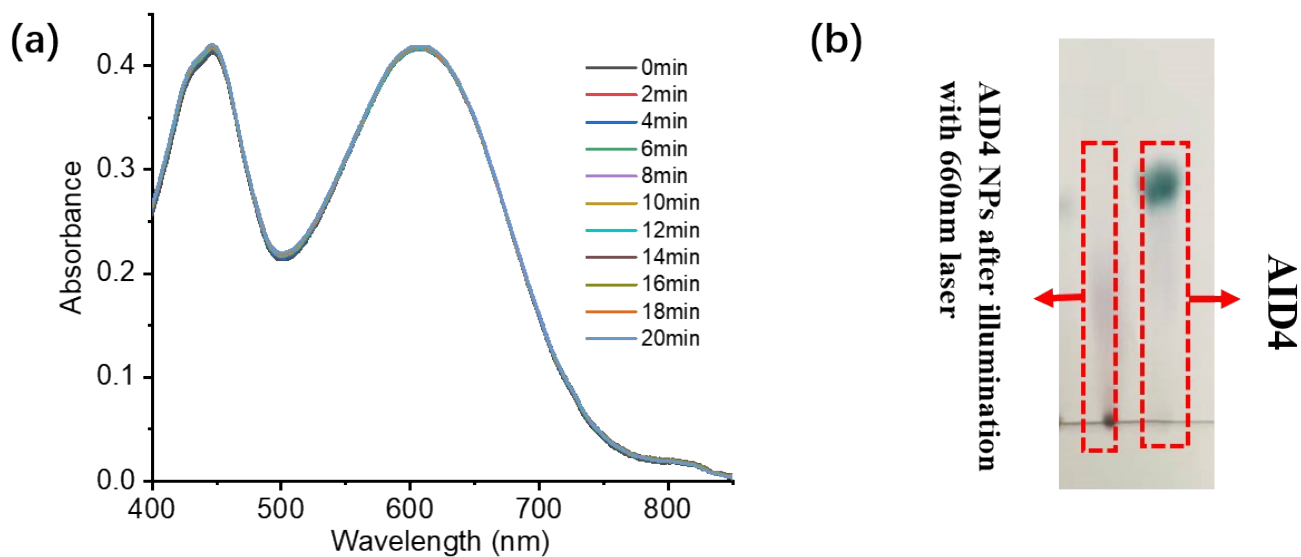

**Figure S16.** (a) UV absorption spectra of 10  $\mu\text{M}$  AID4 in PMMA after 660 nm laser irradiation ( $0.4 \text{ W/cm}^2$ ) with different time. (b) TLC analysis of AID4 and its photolysis products.

## SUPPORTING INFORMATION

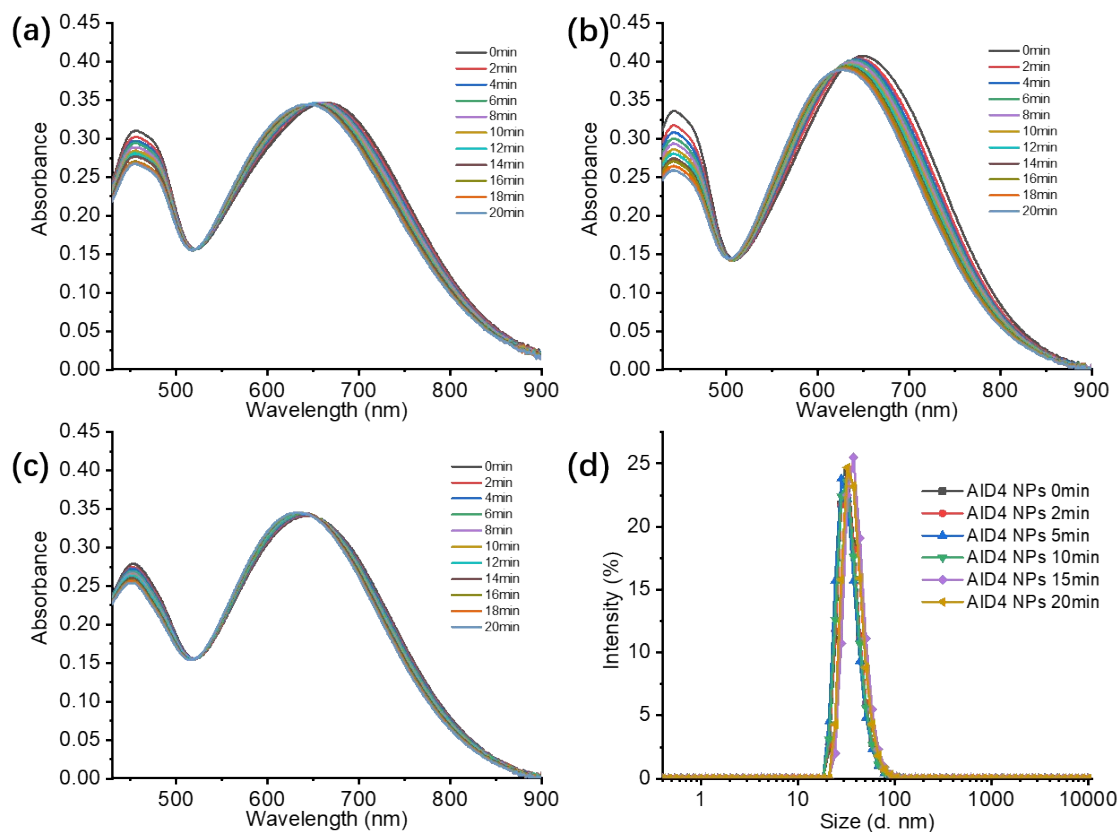

**Figure S17.** UV-vis absorption spectra of 10  $\mu\text{M}$  (a) AID1 NPs, (b) AID2 NPs and (c) AID3 NPs in water after 660 nm laser irradiation ( $0.4 \text{ W/cm}^2$ ) with different time; (d) DLS Size distribution of AID4 NPs after 660 nm laser irradiation with different times measured by DLS in water.

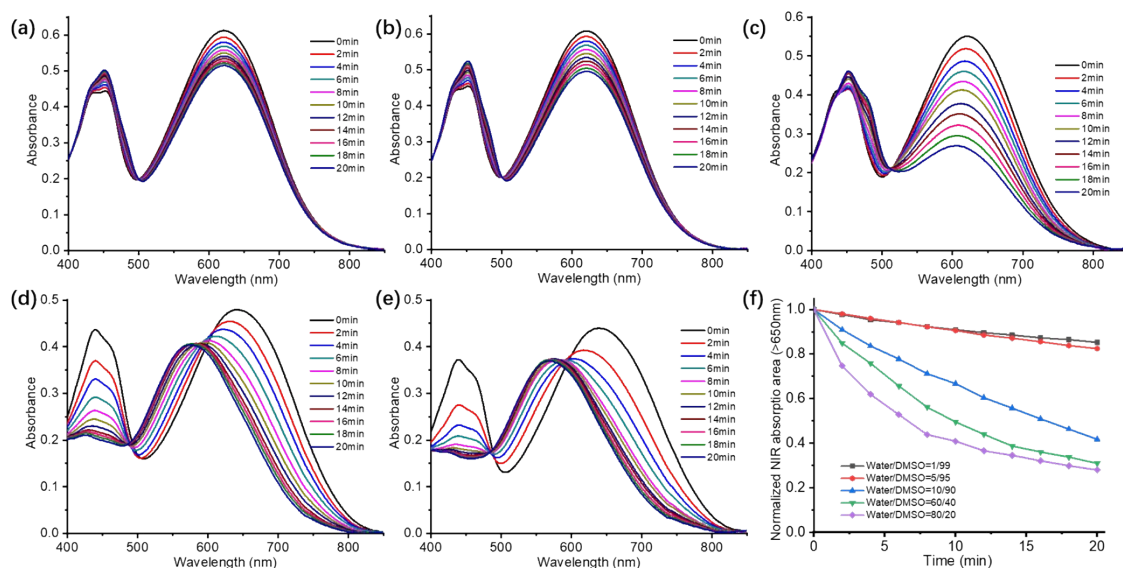

**Figure S18.** UV absorption spectra of 10  $\mu\text{M}$  AID4 NPs in a mixed solvent of DMSO and water ( ( a ) DMSO/water=99/1;(b) DMSO/water=95/5; ( c ) DMSO/water=90/10; ( d ) DMSO/water=40/60; ( e ) DMSO/water=20/80) after 660 nm laser irradiation ( $0.4 \text{ W/cm}^2$ ) with different time; (f) the



## SUPPORTING INFORMATION

absorption area(>650nm) change of AID4 NPs in different ratios of a mixed solvent of DMSO and water with light exposure time.

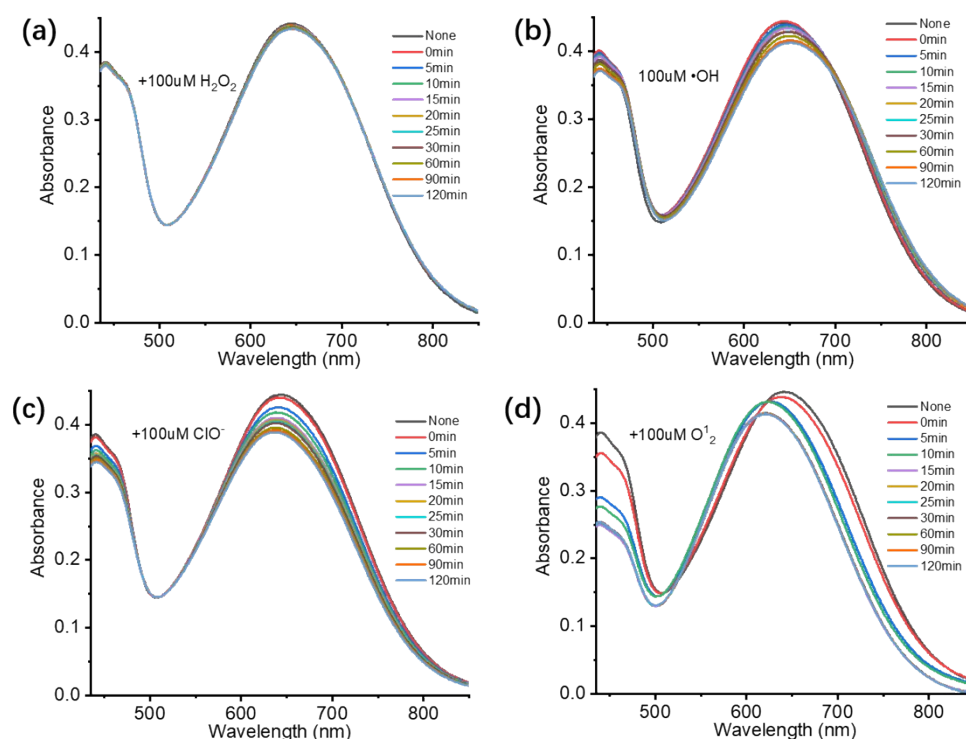

**Figure S19.** UV-vis absorption spectra of 10  $\mu\text{M}$  AID4 in water after adding various oxidizing substances (a) 100  $\mu\text{M}$   $\text{H}_2\text{O}_2$ , (b) 100  $\mu\text{M}$   $\cdot\text{OH}$ , (c) 100  $\mu\text{M}$   $\text{ClO}\cdot$  and (d) 100  $\mu\text{M}$   $\text{O}^1_2$  (100  $\mu\text{M}$   $\text{H}_2\text{O}_2$  + 100  $\mu\text{M}$   $\text{ClO}\cdot$ ) with different reaction time.

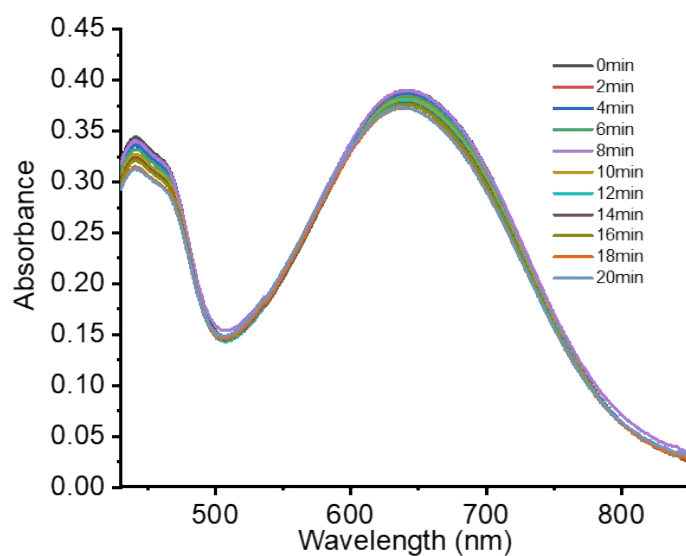

**Figure S20.** UV-vis absorption spectra of 10  $\mu\text{M}$  AID4 in water under hypoxic environment with increasing irradiation time upon 660 nm laser irradiation ( $0.4 \text{ W cm}^{-2}$ ).

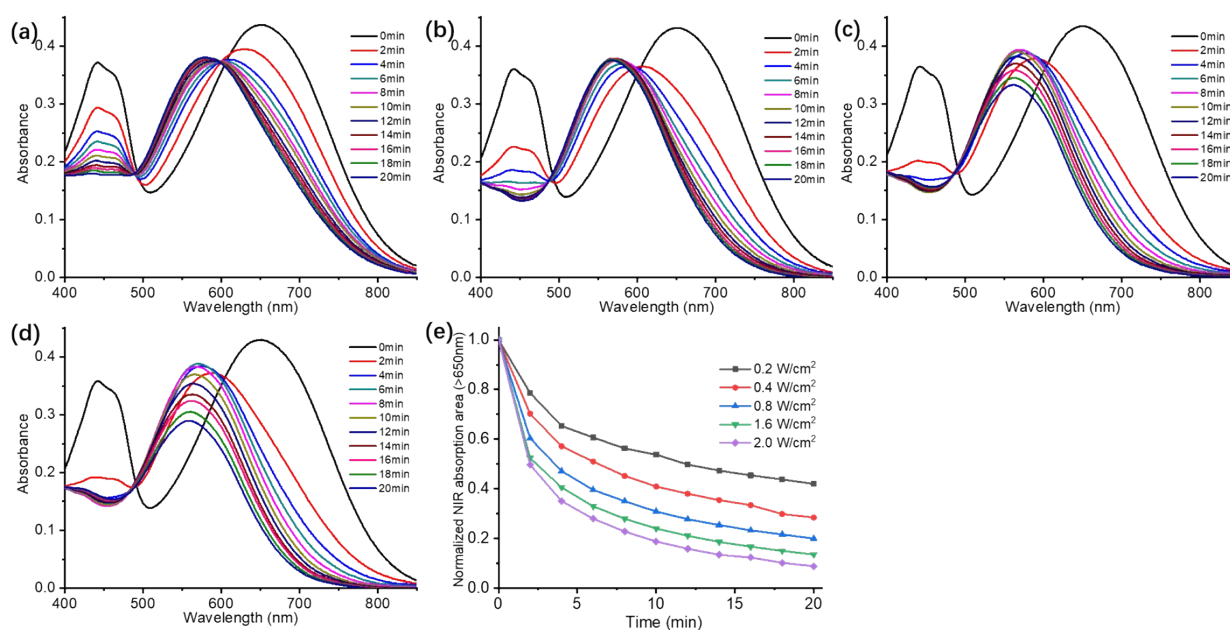

**Figure S21.** UV absorption spectra of 10 μM AID4 NPs in water after 660 nm laser irradiation with different optical power density (a) 0.2 W/cm<sup>2</sup>, (b) 0.8 W/cm<sup>2</sup>, (c) 1.6 W/cm<sup>2</sup>, (d) 2.0 W/cm<sup>2</sup> for different time; (e) the absorption area(>650nm) change of AID4 NPs after 660 nm laser irradiation with different optical power density for different time.

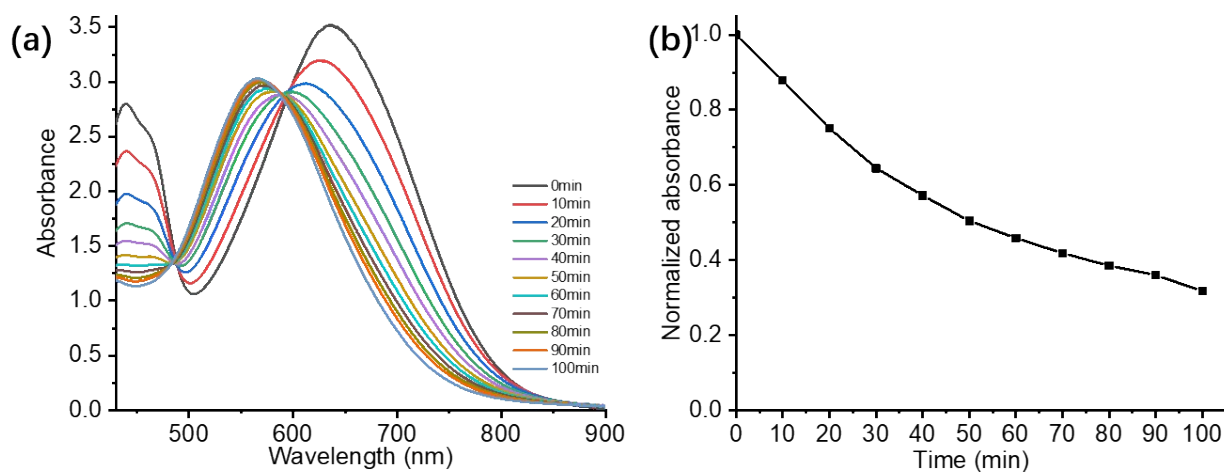

**Figure S22.** (a) UV absorption spectra of 80 μM AID4 NPs in water after 660 nm laser irradiation (0.4 W/cm<sup>2</sup>) with different time; (b) the absorption area(>650nm) change of 80 μM AID4 NPs in water with light exposure time.

# SUPPORTING INFORMATION

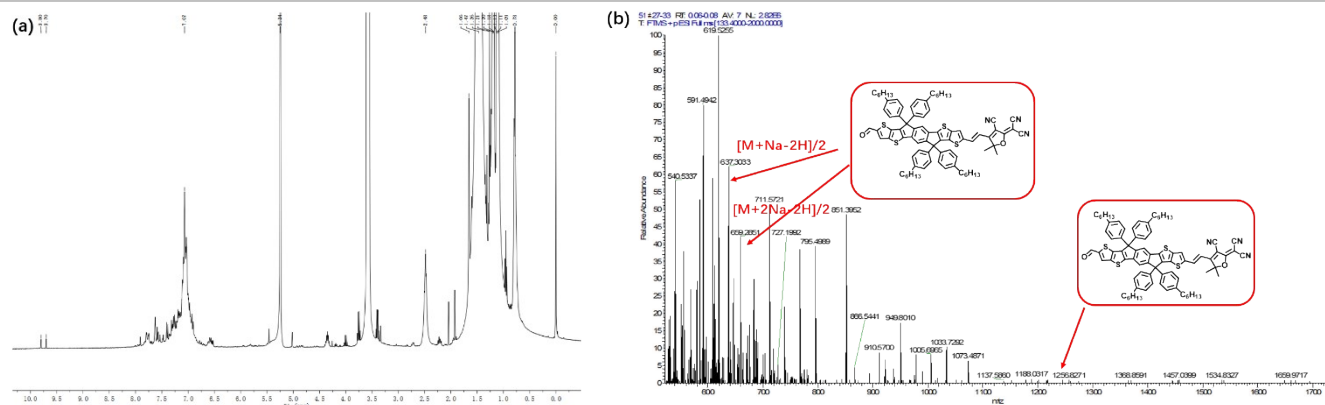

**Figure S23.** (a) the  $^1\text{H}$  NMR spectra and (b) the HRMS spectra of photodegradation products of AID4 NPs.

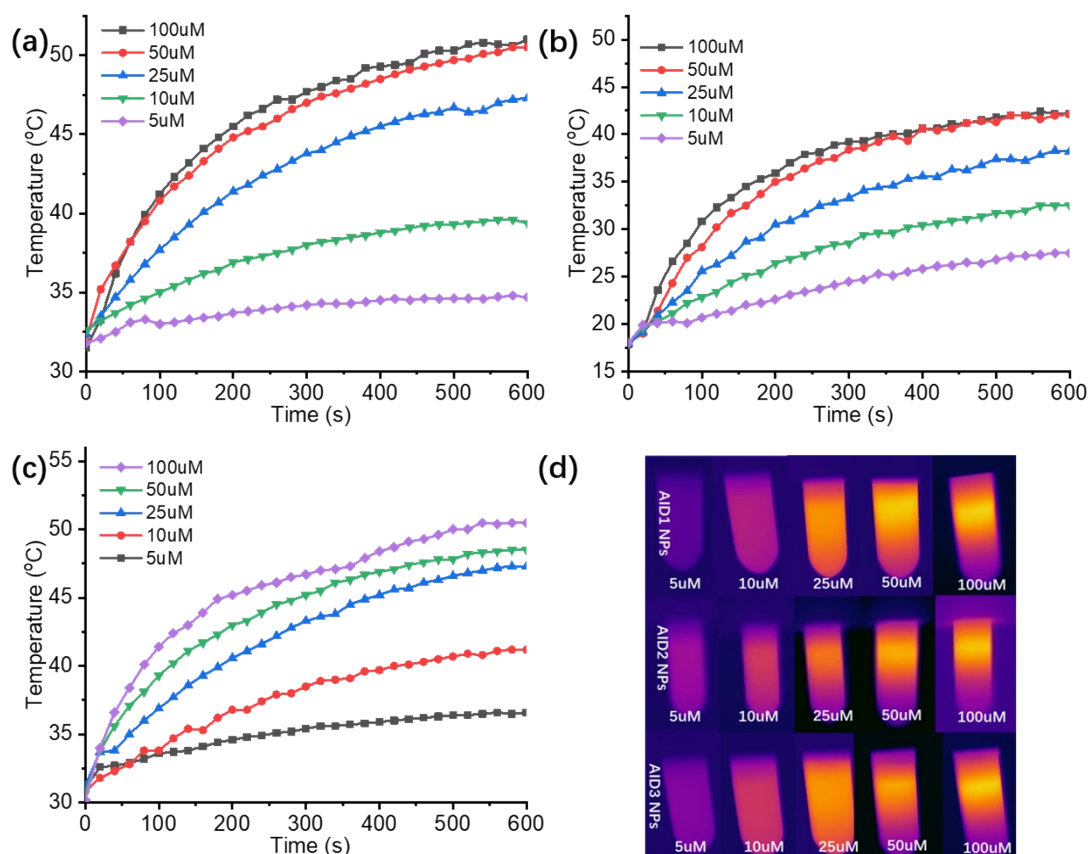

**Figure S24.** Concentration-dependent temperature variation of (a) AID1 NPs ( $\eta = 61.9\%$ ), (b) AID2 NPs ( $\eta = 63.3\%$ ), (c) AID3 NPs ( $\eta = 54.7\%$ ) solution with 660 nm ( $0.4 \text{ W/cm}^2$ ) laser irradiation; IR image of AID 1-3 NPS solution with different concentration after 660 nm laser irradiation ( $0.4 \text{ W cm}^{-2}$ ) for 10min.

## SUPPORTING INFORMATION

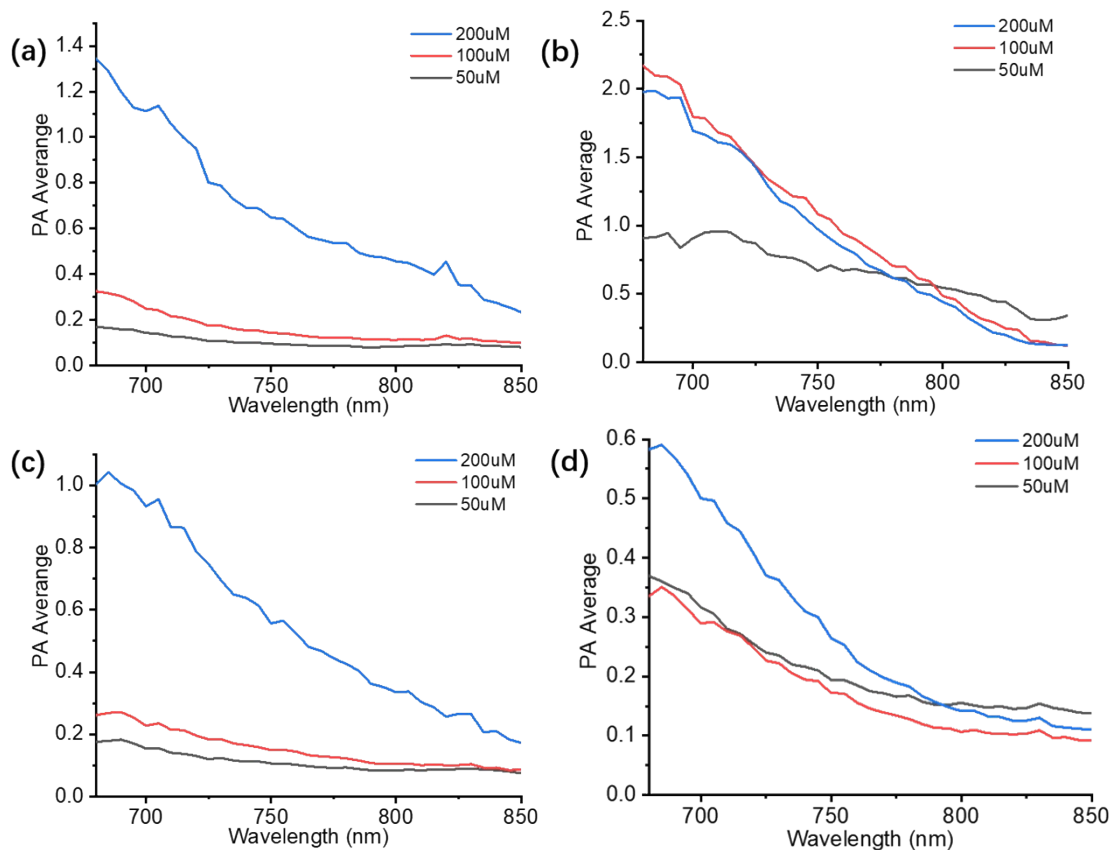

**Figure S25.** PA spectra of different concentrations of (a) AID1 NPs, (b) AID2 NPs, (c) AID3 NPs and (d) AID4 NPs.

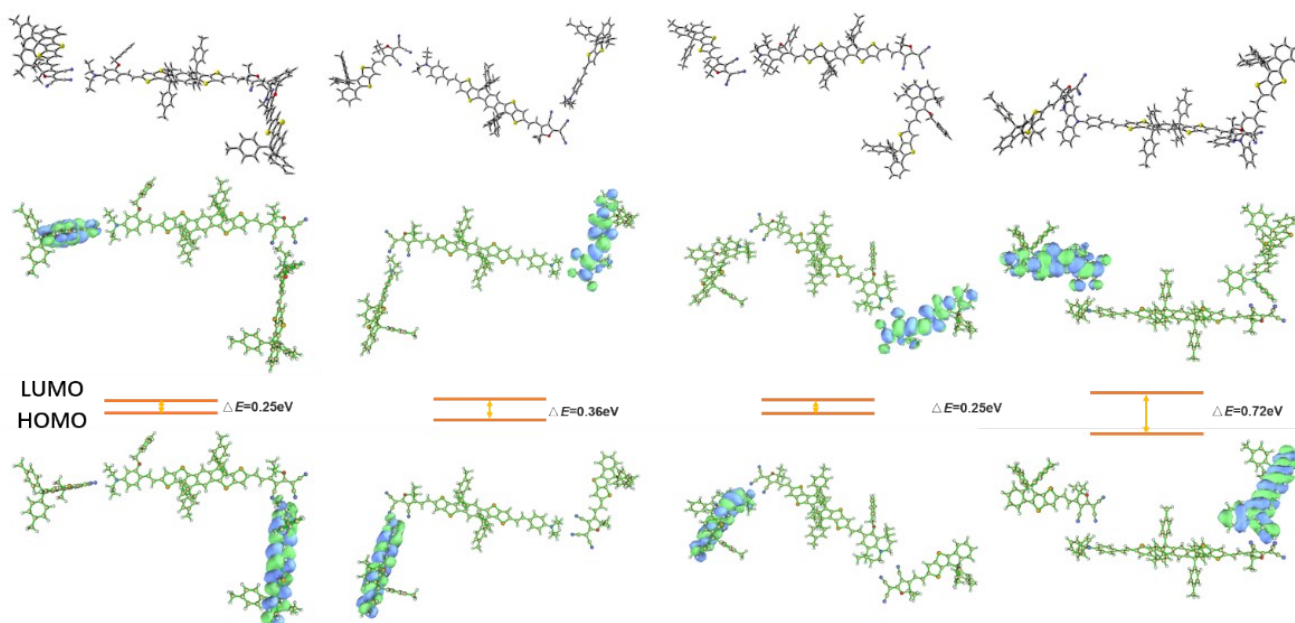

**Figure S26.** the HOMO-LUMO distribution of AID1-4 in J aggregate state and the energy levels and  $\Delta E$  values between HOMO and LUMO.

## SUPPORTING INFORMATION

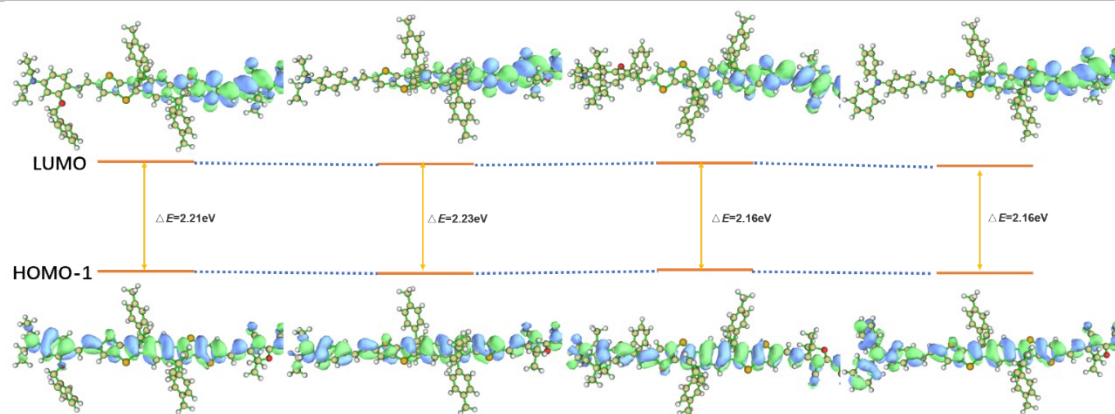

**Figure S27.** single transition of the maximum contribution for their first excited state near the maximum absorption wavelength when AID 1-4 were in monodisperse state.

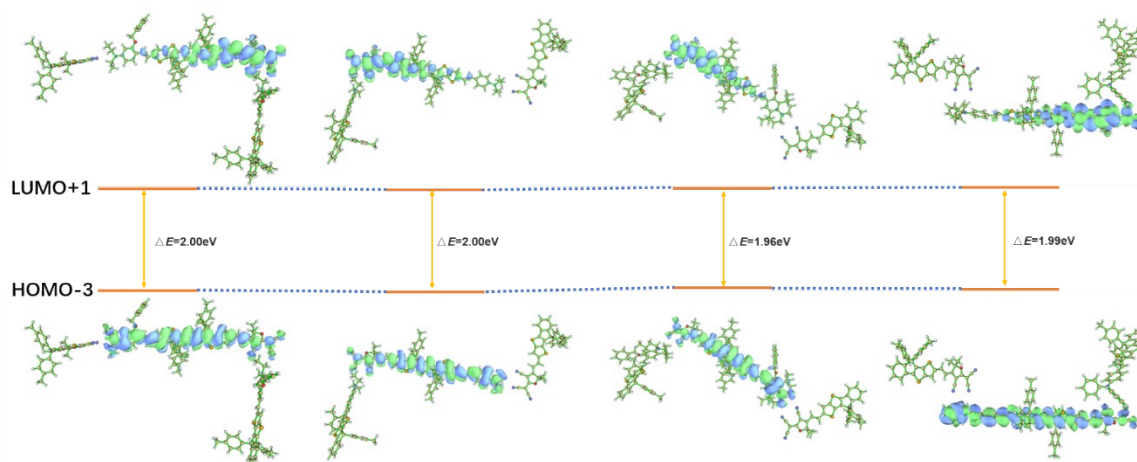

**Figure S28.** single transition of the maximum contribution for their first excited state near the maximum absorption wavelength when AID 1-4 were in J aggregate state.

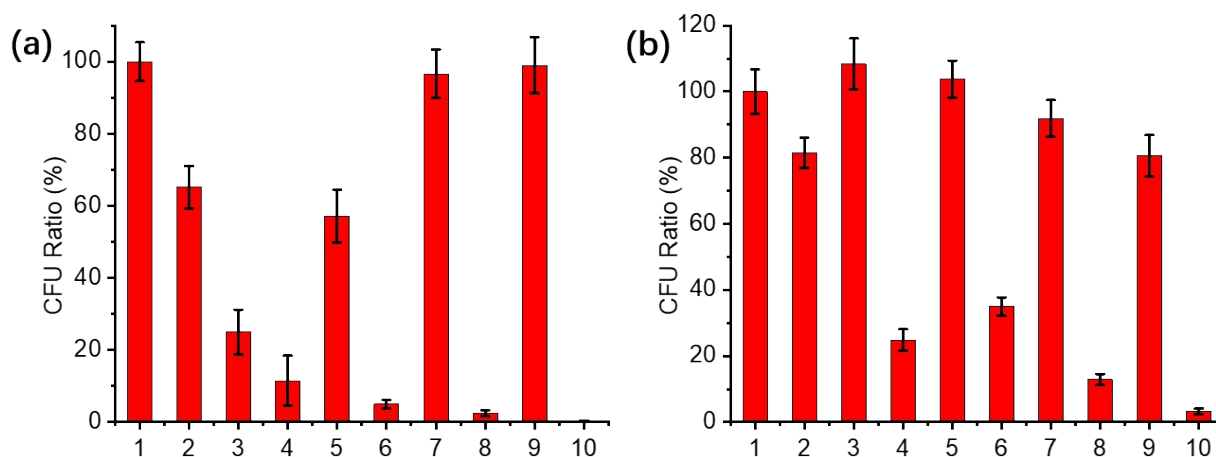

**Figure S29.** Colony-forming unit (CFU) ratio of (a) *S. Aureus* and (b) *E. coli* after different treatment: (1) None, (2) None with Laser, (3) AID1 NPs in dark, (4) AID1 NPs with laser, (5) AID2 NPs in dark, (6) AID2 NPs with laser, (7) AID3 NPs in dark, (8) AID3 NPs with laser, (9) AID4 NPs in dark, (10) AID4 NPs with laser.

## SUPPORTING INFORMATION

**Table S2.** (a) the p values of *S. Aureus* in dark; (b) the p values of *S. Aureus* with 660 nm laser irradiation (0.4 W/cm<sup>2</sup>, 5 min); (c) the p values of *E. Coli* in dark; (d) the p values of *E. Coli* with 660 nm laser irradiation (0.4 W/cm<sup>2</sup>, 5 min).

| (a)      | AID4 NPs | AID3 NPs | AID2 NPs | AID1 NPs |
|----------|----------|----------|----------|----------|
| None     | 0.042    | 0.038    | 0.045    | 0.036    |
| AID1 NPs | 0.049    | 0.045    | 0.049    |          |
| AID2 NPs | 0.039    | 0.042    |          |          |
| AID3 NPs | 0.041    |          |          |          |

| (b)      | AID4 NPs | AID3 NPs | AID2 NPs | AID1 NPs |
|----------|----------|----------|----------|----------|
| None     | 0.036    | 0.046    | 0.047    | 0.043    |
| AID1 NPs | 0.043    | 0.038    | 0.037    |          |
| AID2 NPs | 0.042    | 0.046    |          |          |
| AID3 NPs | 0.035    |          |          |          |

| (c)      | AID4 NPs | AID3 NPs | AID2 NPs | AID1 NPs |
|----------|----------|----------|----------|----------|
| None     | 0.045    | 0.042    | 0.041    | 0.029    |
| AID1 NPs | 0.046    | 0.043    | 0.039    |          |
| AID2 NPs | 0.049    | 0.038    |          |          |
| AID3 NPs | 0.048    |          |          |          |

| (d)      | AID4 NPs | AID3 NPs | AID2 NPs | AID1 NPs |
|----------|----------|----------|----------|----------|
| None     | 0.043    | 0.046    | 0.042    | 0.048    |
| AID1 NPs | 0.038    | 0.041    | 0.036    |          |
| AID2 NPs | 0.047    | 0.038    |          |          |
| AID3 NPs | 0.038    |          |          |          |

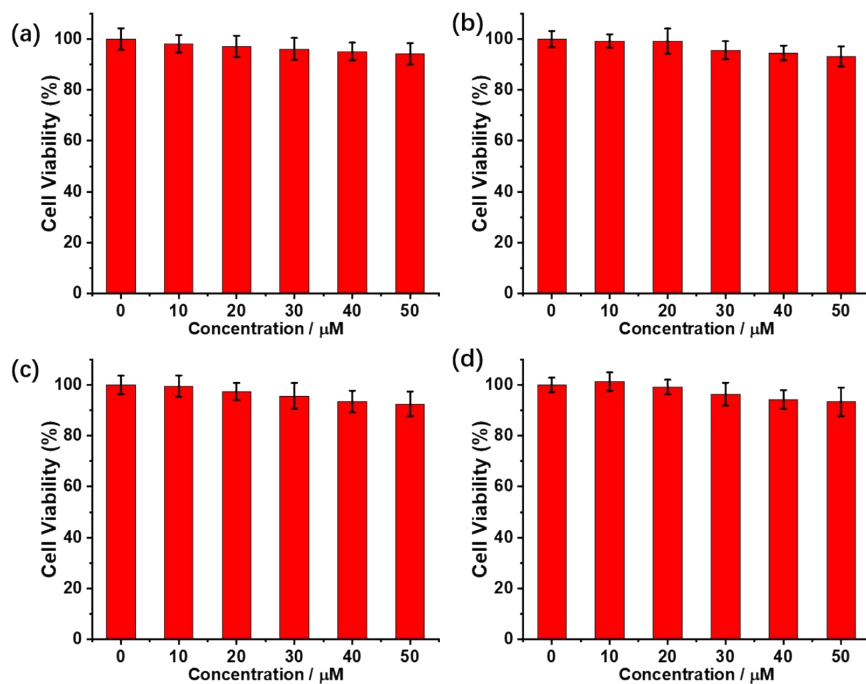

**Figure S30.** Cell viability of 4T1 cells at varied concentrations of (a) AID1 NPs, (b) AID2 NPs, (c) AID3 NPs and (d) AID4 NPs in dark using CCK8 assay.

**Table S3.** The p values of Cell viability of 4T1 cells at varied concentrations of (a) AID1 NPs, (b) AID2 NPs, (c) AID3 NPs and (d) AID4 NPs

| (a) | 0     | 10    | 20    | 30    | 40    |
|-----|-------|-------|-------|-------|-------|
| 50  | 0.048 | 0.058 | 0.043 | 0.054 | 0.037 |
| 40  | 0.052 | 0.047 | 0.052 | 0.032 |       |
| 30  | 0.039 | 0.042 | 0.044 |       |       |
| 20  | 0.042 | 0.039 |       |       |       |
| 10  | 0.032 |       |       |       |       |

| (b) | 0     | 10    | 20    | 30    | 40    |
|-----|-------|-------|-------|-------|-------|
| 50  | 0.041 | 0.038 | 0.036 | 0.034 | 0.047 |
| 40  | 0.047 | 0.046 | 0.042 | 0.042 |       |
| 30  | 0.049 | 0.042 | 0.054 |       |       |
| 20  | 0.024 | 0.029 |       |       |       |
| 10  | 0.038 |       |       |       |       |

| (c) | 0     | 10    | 20    | 30    | 40    |
|-----|-------|-------|-------|-------|-------|
| 50  | 0.050 | 0.038 | 0.047 | 0.036 | 0.046 |
| 40  | 0.041 | 0.045 | 0.043 | 0.042 |       |
| 30  | 0.041 | 0.042 | 0.047 |       |       |
| 20  | 0.046 | 0.032 |       |       |       |
| 10  | 0.038 |       |       |       |       |

| (d) | 0     | 10    | 20    | 30    | 40    |
|-----|-------|-------|-------|-------|-------|
| 50  | 0.041 | 0.048 | 0.054 | 0.045 | 0.039 |
| 40  | 0.056 | 0.057 | 0.032 | 0.026 |       |
| 30  | 0.049 | 0.032 | 0.044 |       |       |
| 20  | 0.032 | 0.049 |       |       |       |
| 10  | 0.042 |       |       |       |       |

## SUPPORTING INFORMATION

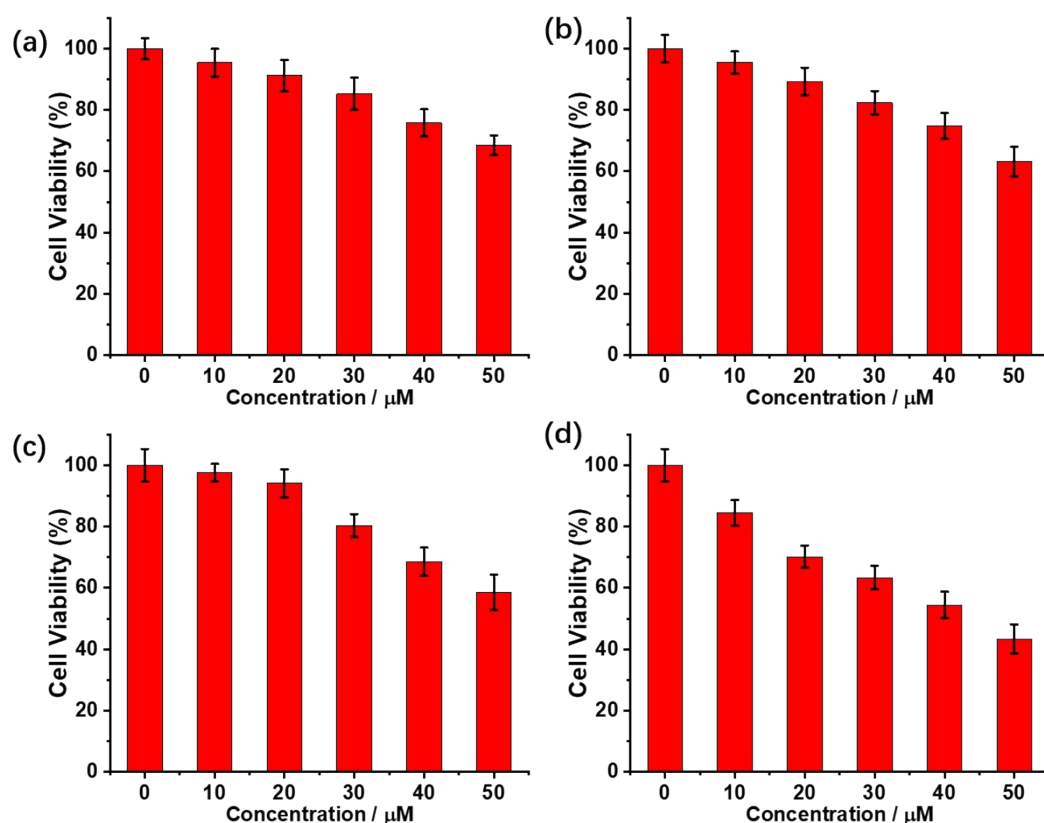

**Figure S31.** Cell viability of 4T1 cells at varied concentrations of (a) AID1 NPs, (b) AID2 NPs, (c) AID3 NPs and (d) AID4 NPs exposed to 660nm laser ( $0.4W/cm^2$ ) for 10 minutes using CCK8 assay.

**Table S4.** The p values of Cell viability of 4T1 cells at varied concentrations of (a) AID1 NPs, (b) AID2 NPs, (c) AID3 NPs and (d) AID4 NPs exposed to 660nm laser ( $0.4W/cm^2$ ) for 10 minutes using CCK8 assay.

|     | 0  | 10    | 20    | 30    | 40    |       | 0   | 10    | 20    | 30    | 40    |       |       |
|-----|----|-------|-------|-------|-------|-------|-----|-------|-------|-------|-------|-------|-------|
| (a) | 50 | 0.039 | 0.047 | 0.036 | 0.056 | (b)   | 50  | 0.036 | 0.045 | 0.055 | 0.042 | 0.049 |       |
|     | 40 | 0.041 | 0.056 | 0.047 | 0.053 |       | 40  | 0.040 | 0.035 | 0.040 | 0.045 |       |       |
|     | 30 | 0.050 | 0.053 | 0.053 |       |       | 30  | 0.051 | 0.031 | 0.041 |       |       |       |
|     | 20 | 0.053 | 0.028 |       |       |       | 20  | 0.043 | 0.043 |       |       |       |       |
|     | 10 | 0.043 |       |       |       |       | 10  | 0.021 |       |       |       |       |       |
| (c) | 50 | 0.051 | 0.043 | 0.032 | 0.041 | 0.050 | (d) | 50    | 0.037 | 0.044 | 0.029 | 0.043 | 0.057 |
|     | 40 | 0.039 | 0.035 | 0.039 | 0.045 | 40    |     | 0.031 | 0.026 | 0.031 | 0.053 |       |       |
|     | 30 | 0.052 | 0.032 | 0.056 |       | 30    |     | 0.052 | 0.021 | 0.023 |       |       |       |
|     | 20 | 0.055 | 0.051 |       |       | 20    |     | 0.021 | 0.018 |       |       |       |       |
|     | 10 | 0.045 |       |       |       | 10    |     | 0.043 |       |       |       |       |       |

## SUPPORTING INFORMATION

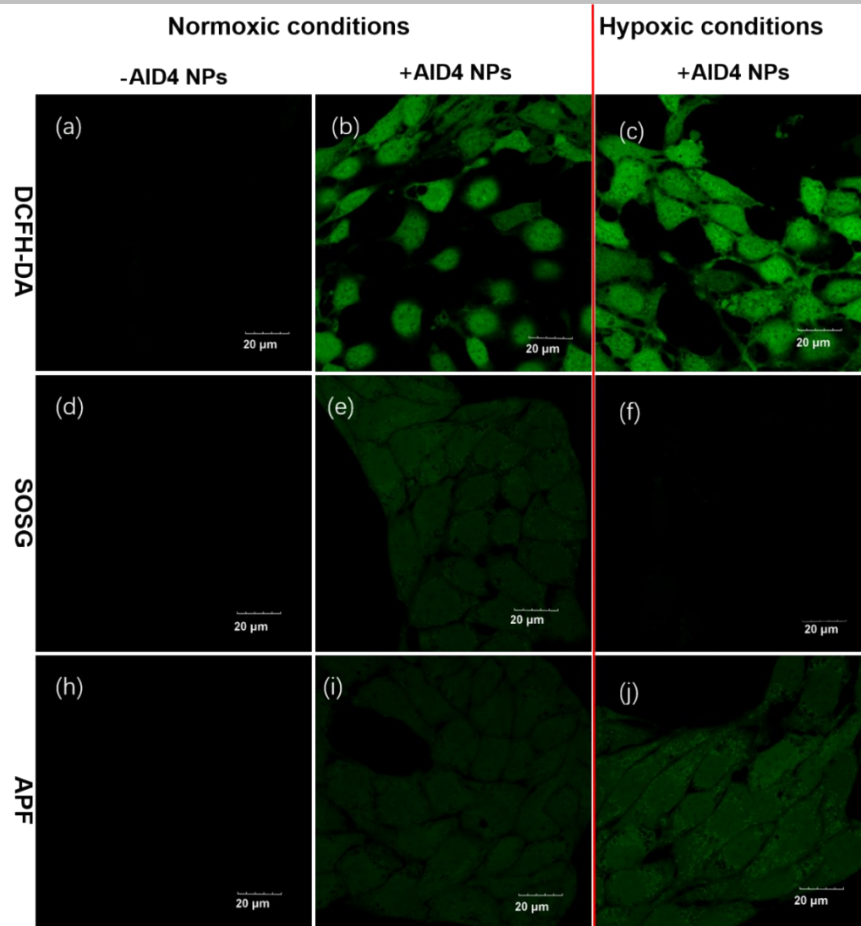

**Figure S32.** ROS detection in 4T1 cells under normoxia and hypoxia conditions using (a-c) DCFH-DA, (d-f) SOSG and (h-j) APF as total ROS,  $^1\text{O}_2$  and  $\bullet\text{OH}$  fluorescence indicator.

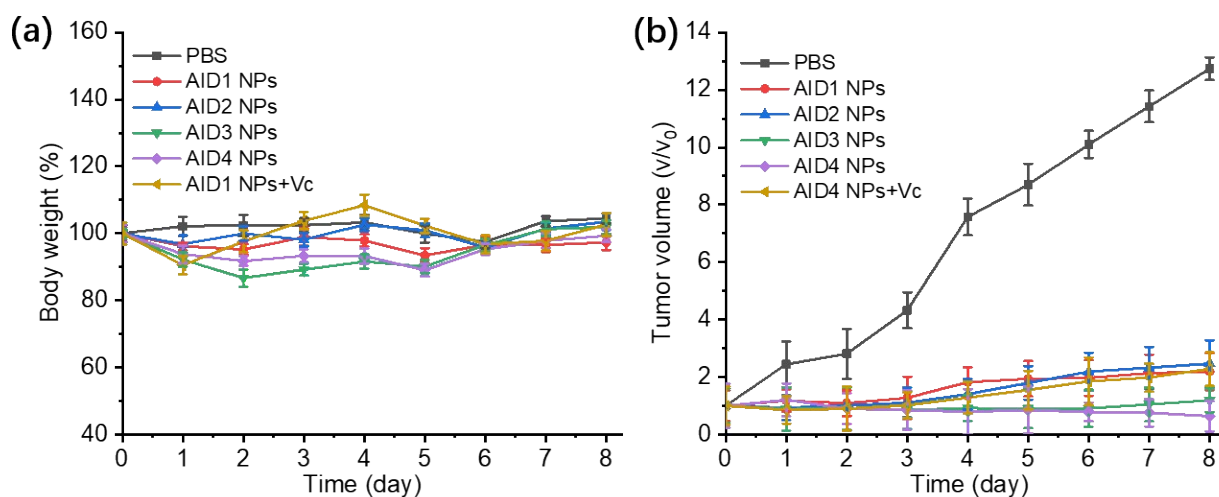

**Figure S33.** (a) relative body weight changes of mice during different treatments. (b) curve of the tumor size with the time.



## SUPPORTING INFORMATION

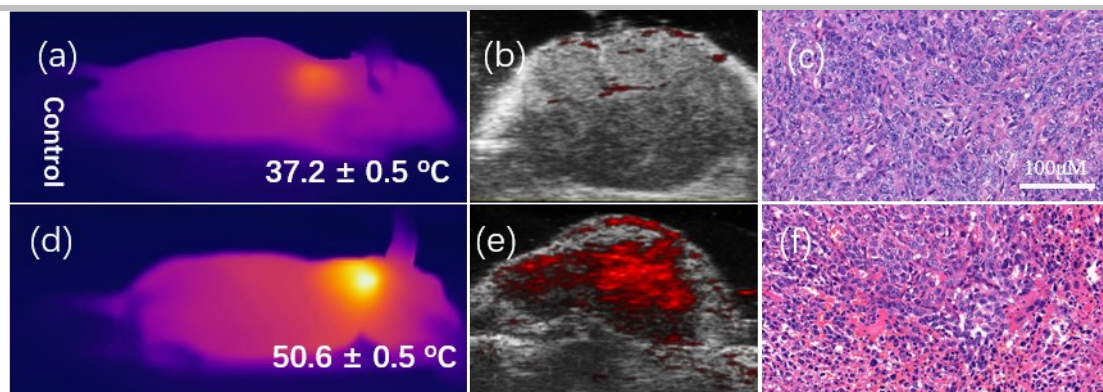

**Figure S34.** IR thermal imaging of 4T1 tumor-xenograft mice irradiated by 660 nm laser ( $0.4 \text{ W/cm}^2$ ) for 10 min after in vivo injection of (a) PBS and (d) Vitamin C + AID4 NPs ; (b) and (e) corresponding PAI; (c) and (f) tumor H&E-stained slices of the mice after the phototherapy.

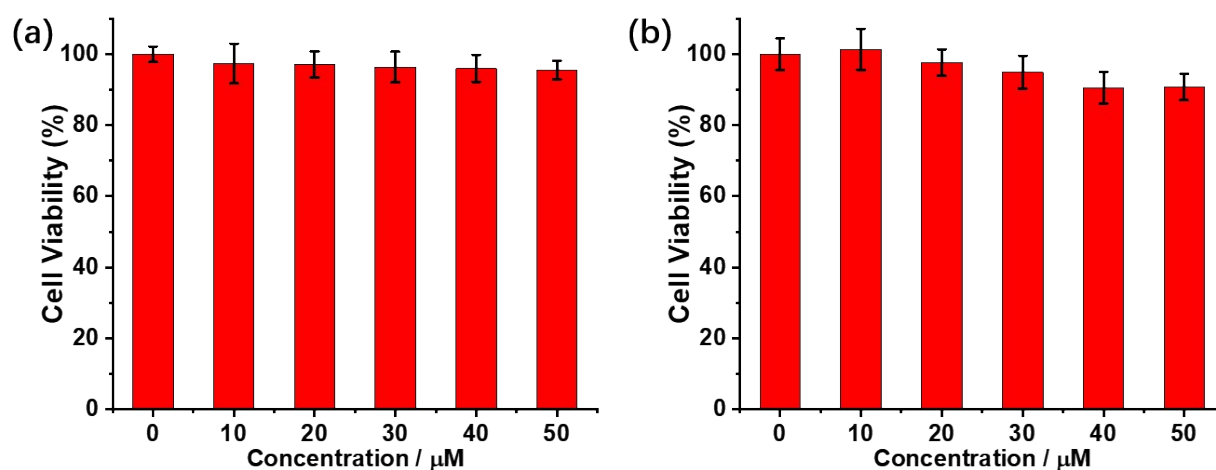

**Figure S35.** Cell viability of 4T1 at varied concentrations of photodegradation products of AID4 NPs with different concentrations using CCK8 assay (a) in dark and (b) exposed to 660nm laser ( $0.4 \text{ W/cm}^2$ ) for 10 minutes.

**Table S5.** The p values of cell viability of 4T1 at varied concentrations of photodegradation products of AID4 NPs with different concentrations using CCK8 assay (a) in dark and (b) exposed to 660nm laser ( $0.4 \text{ W/cm}^2$ ) for 10 minutes.

| (a) | 0     | 10    | 20    | 30    | 40    | (b) | 0     | 10    | 20    | 30    | 40    |
|-----|-------|-------|-------|-------|-------|-----|-------|-------|-------|-------|-------|
| 50  | 0.043 | 0.037 | 0.020 | 0.031 | 0.014 | 50  | 0.052 | 0.034 | 0.038 | 0.035 | 0.028 |
| 40  | 0.039 | 0.052 | 0.038 | 0.043 |       | 40  | 0.047 | 0.042 | 0.034 | 0.039 |       |
| 30  | 0.043 | 0.038 | 0.047 |       |       | 30  | 0.025 | 0.036 | 0.027 |       |       |
| 20  | 0.035 | 0.029 |       |       |       | 20  | 0.028 | 0.045 |       |       |       |
| 10  | 0.034 |       |       |       |       | 10  | 0.023 |       |       |       |       |

## SUPPORTING INFORMATION

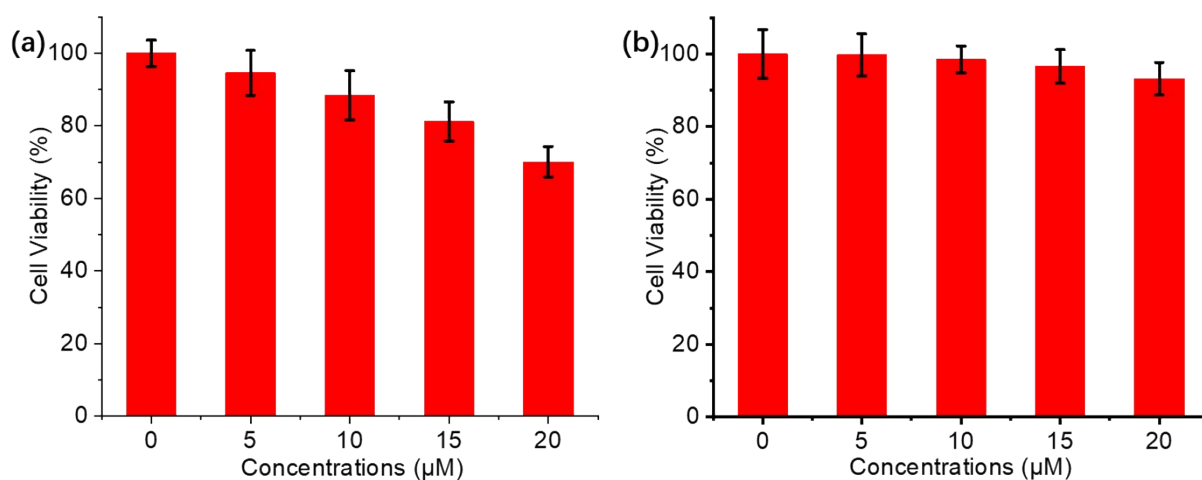

**Figure S36.** (a) Cell viability of L929 cells at varied concentrations of (a) Methylene blue after laser irradiation for 30min, (b) AID4 NPs after laser irradiation for 30min.

**Table S6.** The p values of cell viability of L929 cells at varied concentrations of (a) Methylene blue after laser irradiation for 30min, (b) AID4 NPs after laser irradiation for 30min.

| (a) | 0     | 5     | 10    | 15    | (b) | 0     | 5     | 10    | 15    |
|-----|-------|-------|-------|-------|-----|-------|-------|-------|-------|
| 20  | 0.038 | 0.030 | 0.036 | 0.045 | 20  | 0.042 | 0.053 | 0.028 | 0.039 |
| 15  | 0.045 | 0.036 | 0.042 | 0.023 | 15  | 0.053 | 0.045 | 0.035 | 0.037 |
| 10  | 0.046 | 0.053 |       |       | 10  | 0.034 | 0.041 |       |       |
| 5   | 0.024 |       |       |       | 5   | 0.035 |       |       |       |

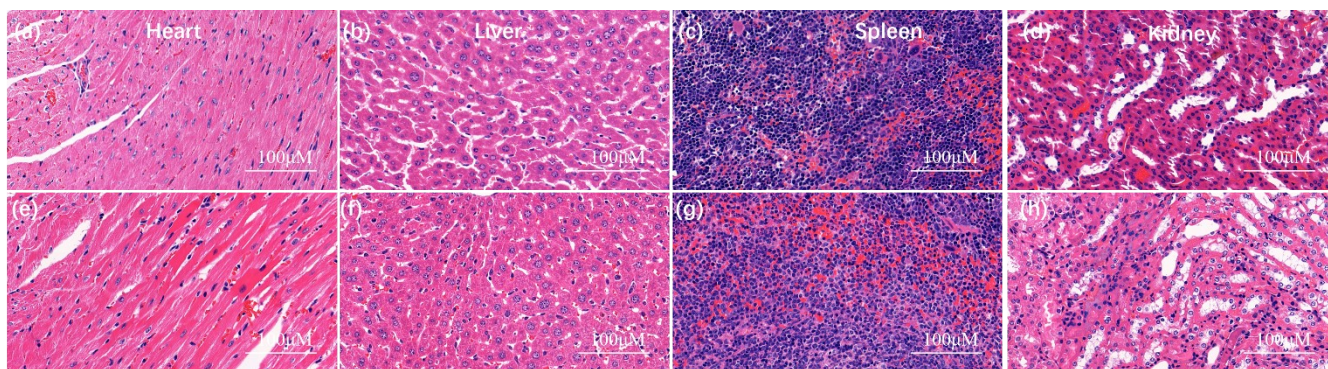

**Figure S37.** the H&E-stained slices of the (a) heart, (b) liver, (c) spleen and (d) kidney of healthy mice; the H&E-stained slices of the (e) heart, (f) liver, (g) spleen and (h) kidney after therapy using AID4 NPs.

# SUPPORTING INFORMATION

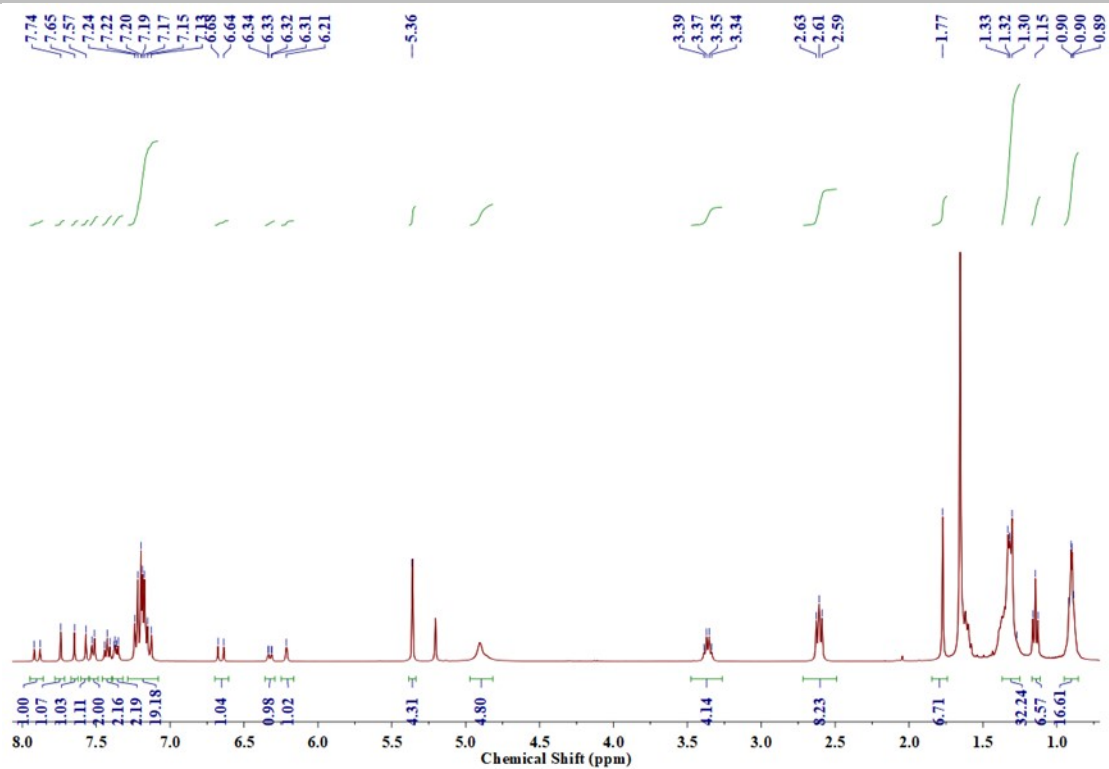

**Figure S38. the  $^1\text{H}$  NMR spectra of AID1**

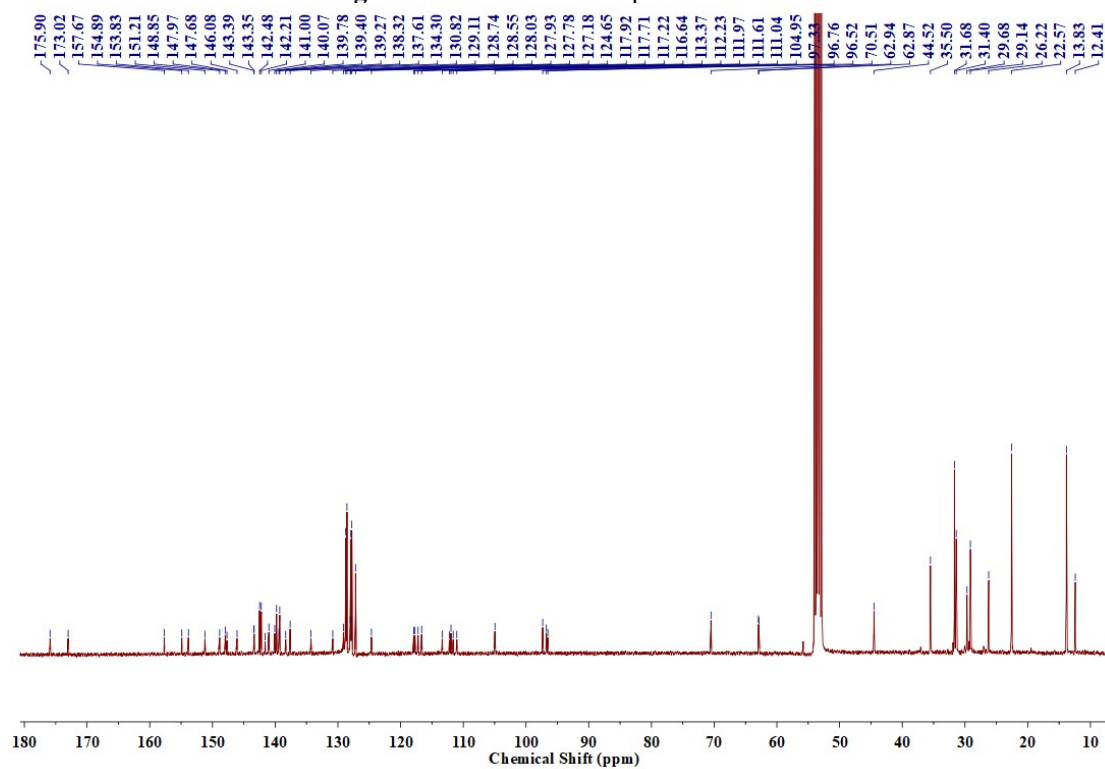

**Figure S39. the  $^{13}\text{C}$  NMR spectra of AID1**

# SUPPORTING INFORMATION

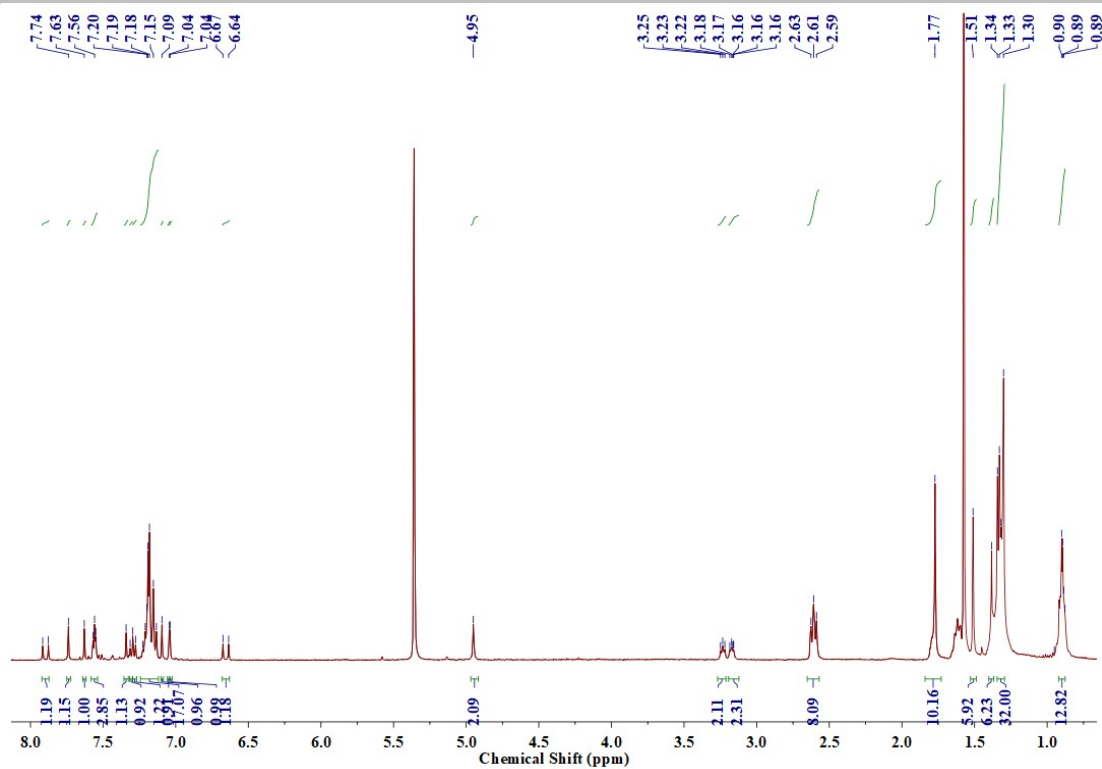

Figure S40. the <sup>1</sup>H NMR spectra of AID2

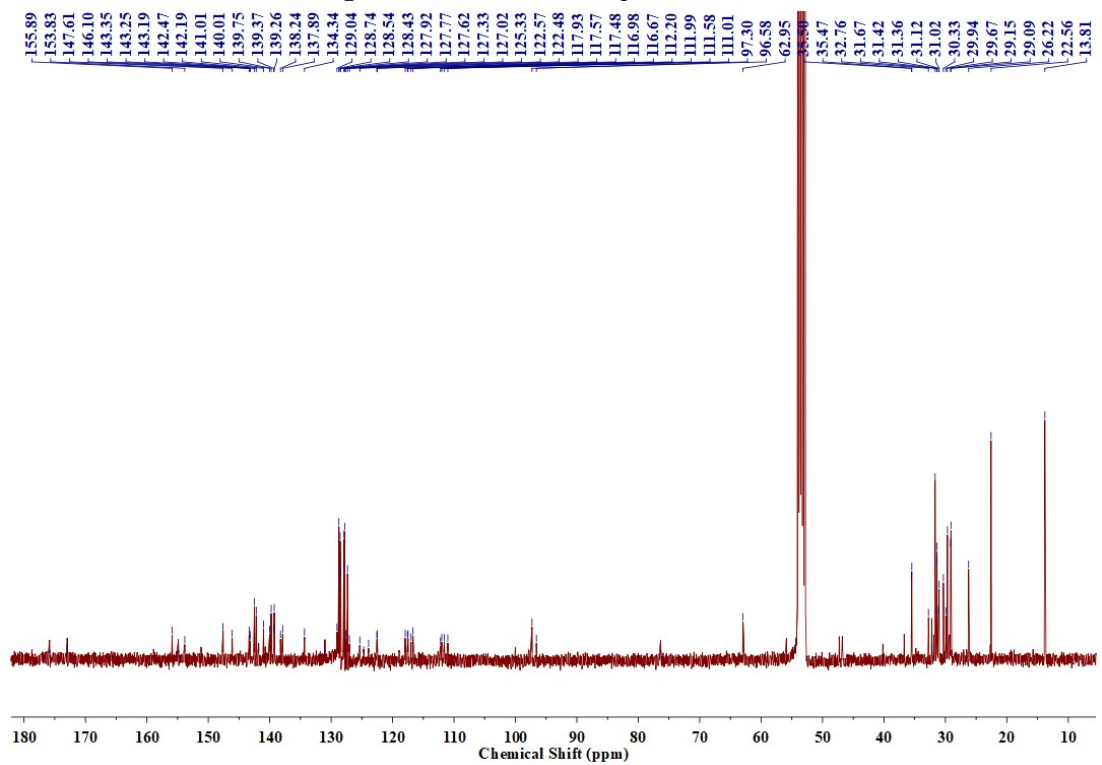

Figure S41. the <sup>13</sup>C NMR spectra of AID2

# SUPPORTING INFORMATION

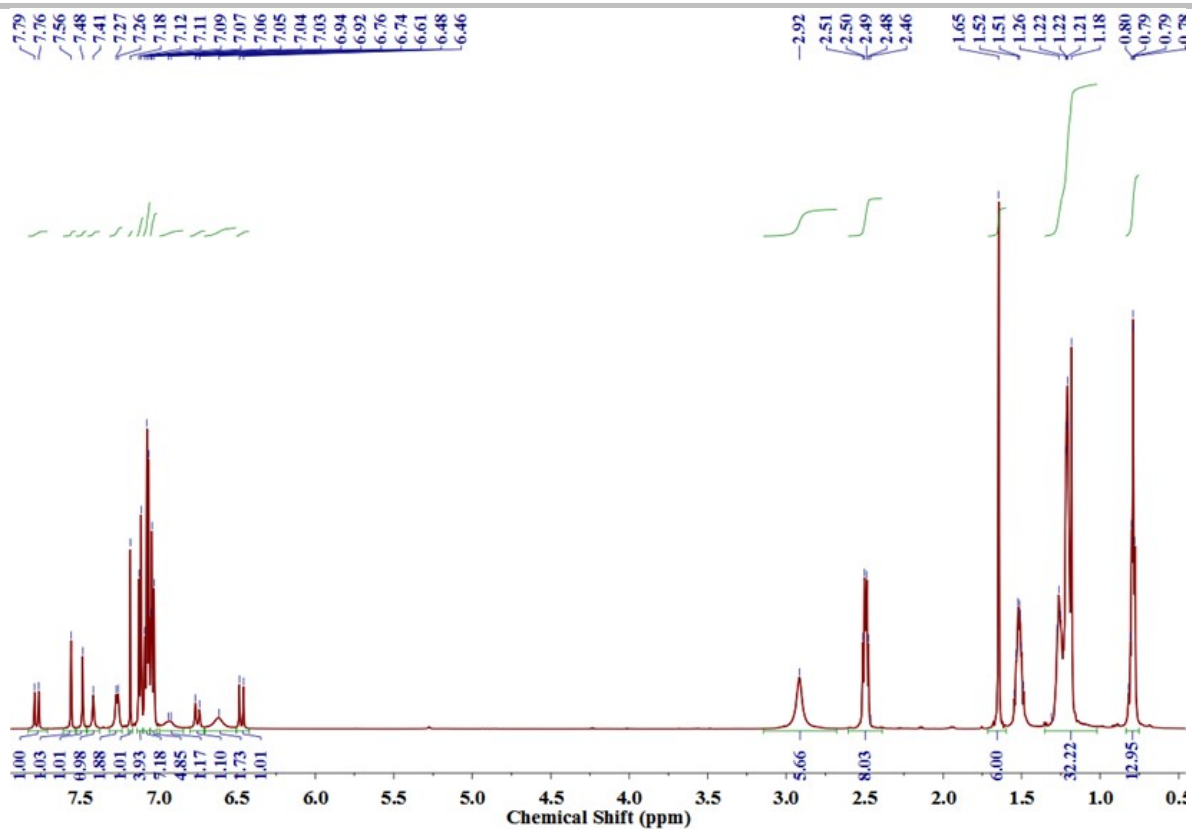

Figure S42. the  $^1\text{H}$  NMR spectra of AID3

# SUPPORTING INFORMATION

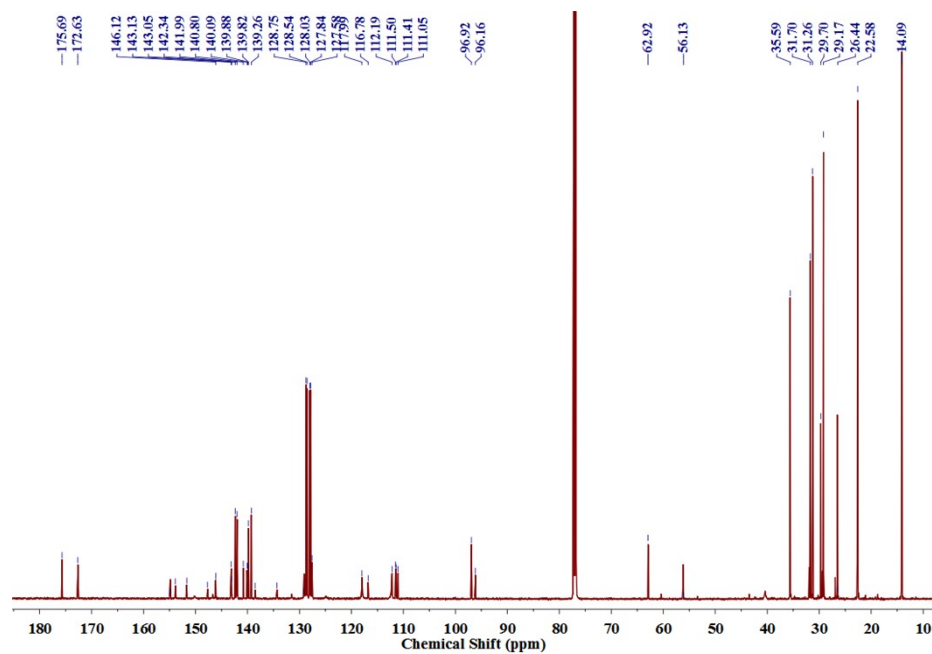

Figure S43. the  $^{13}\text{C}$  NMR spectra of AID3

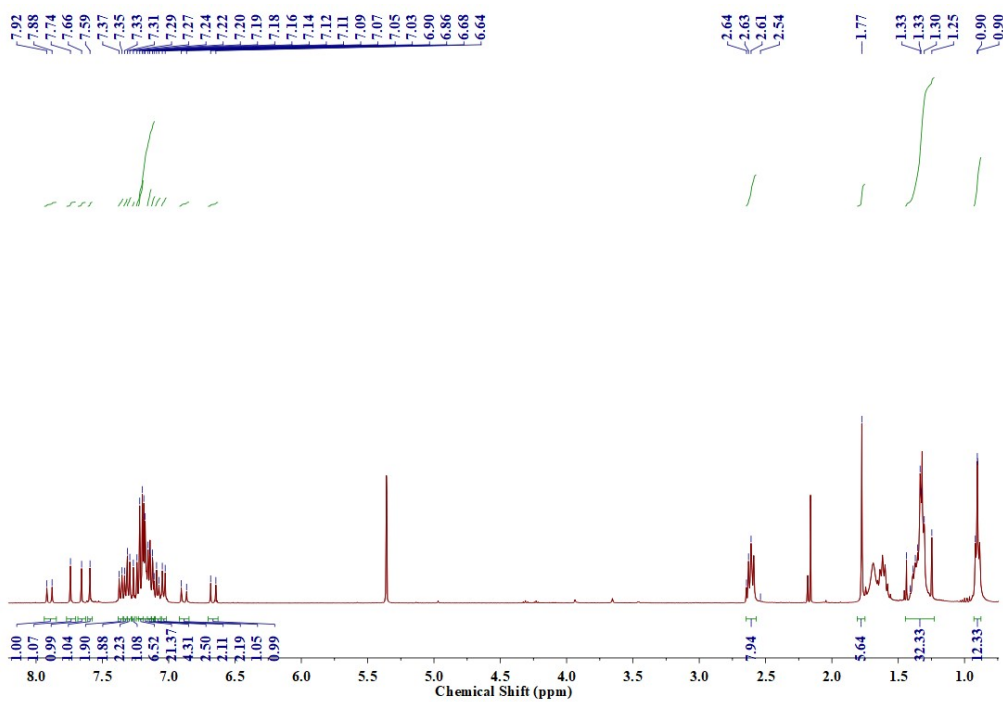

Figure S44. the  $^1\text{H}$  NMR spectra of AID4

# SUPPORTING INFORMATION

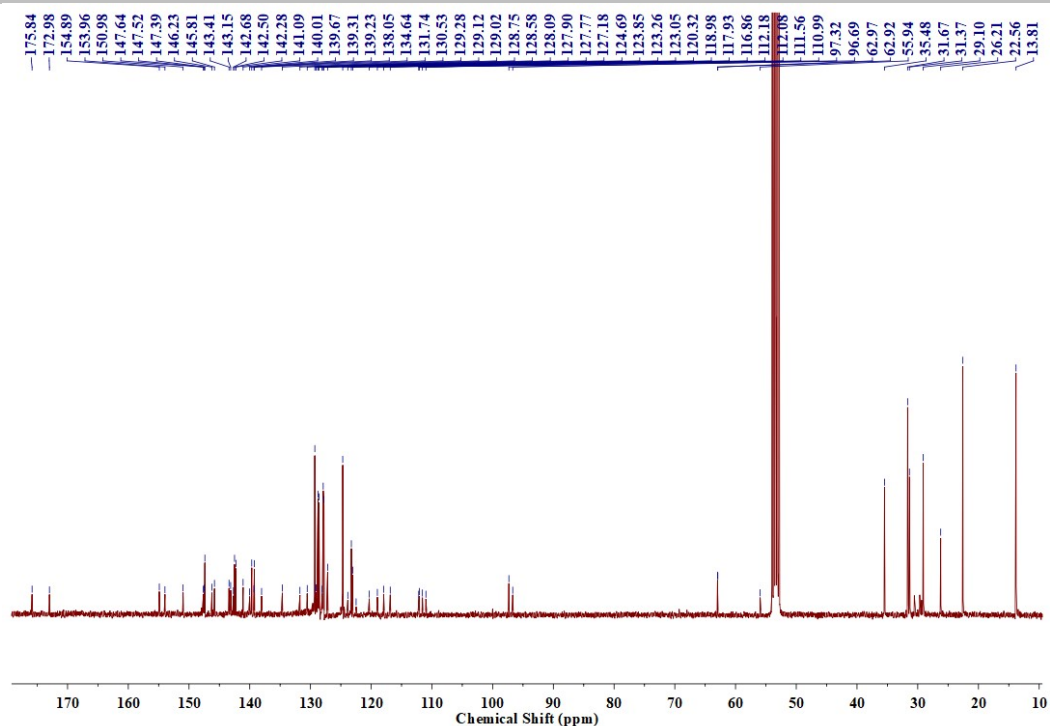

Figure S45. the  $^{13}\text{C}$  NMR spectra of AID4

20200616-31 #15 RT: 0.11 AV: 1 NL: 5.46E6  
T: FTMS + p ESI Full lock.ms [150.0000-2250.0000]

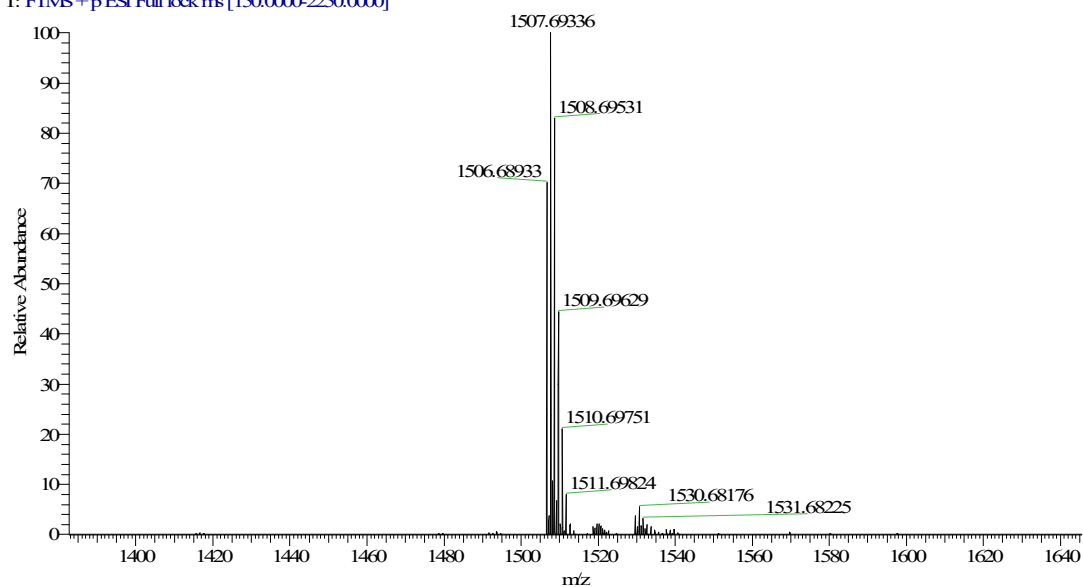

Figure S46. The HRMS spectra of AID1

# SUPPORTING INFORMATION

LiLu7E #41-43 RT: 0.25-0.26 AV: 3 NL: 1.66E5  
T: FTMS+p ESI Full lock.ms [200.0000-3000.0000]

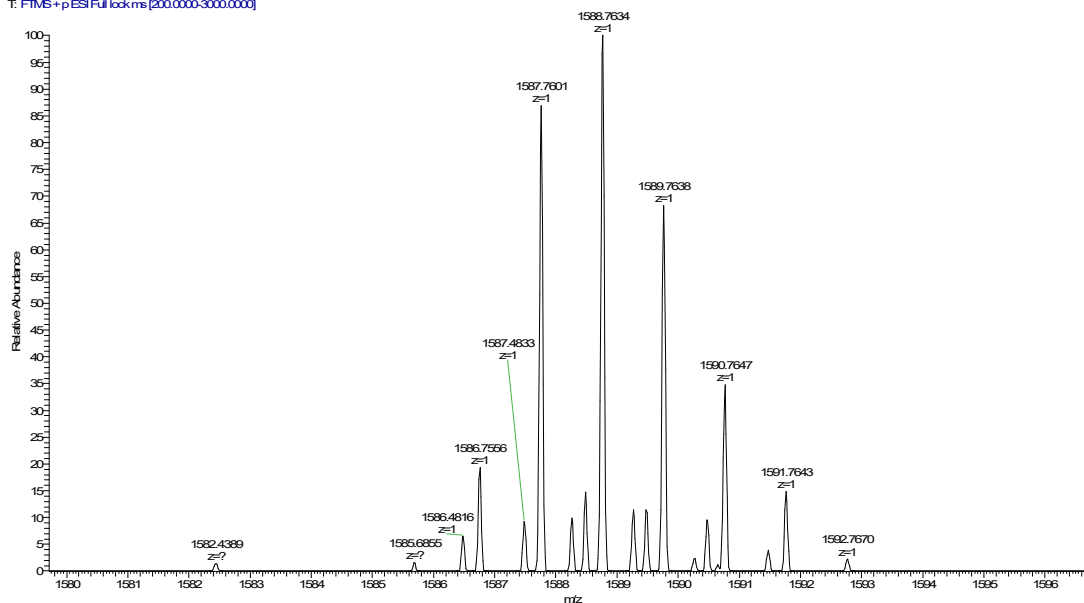

Figure S47. The HRMS spectra of AID2

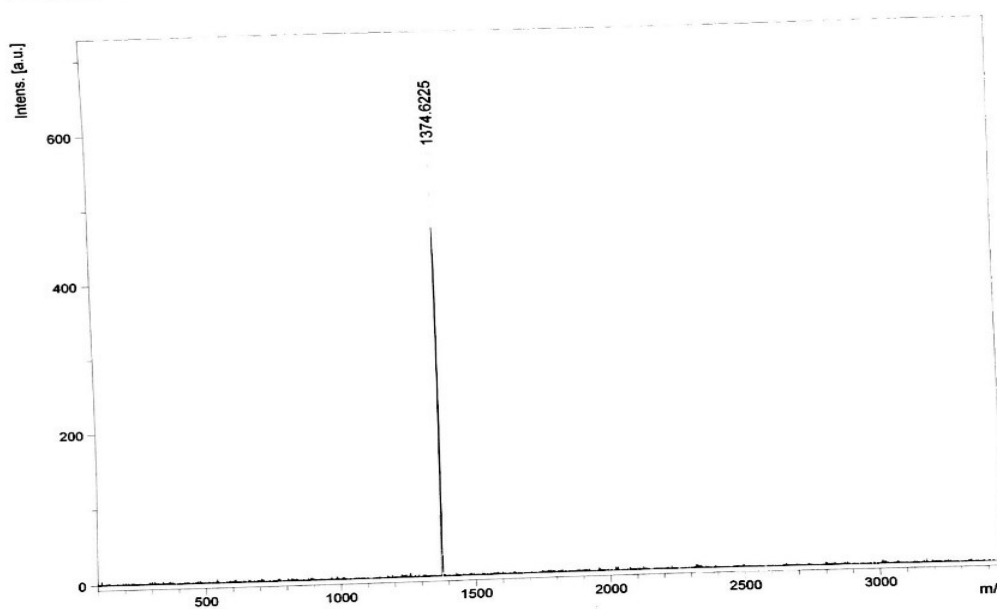

Figure S48. The HRMS spectra of AID3



## SUPPORTING INFORMATION

69-26\_20220314124546 #9 RT: 0.07 AV: 1 NL: 8,28E5  
T: FTMS+pESI Full lock.ms [200.0000-3000.0000]

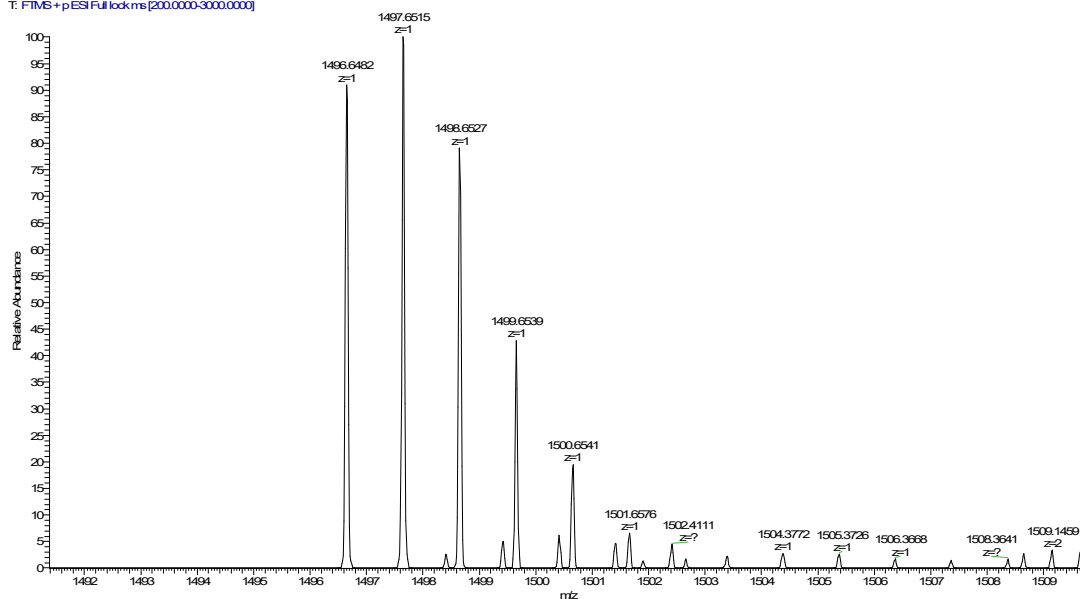

**Figure S49.** The HRMS spectra of AID4

### References

- [1] Lu T, Chen F. Multiwfn: a multifunctional wavefunction analyzer. *Journal of computational chemistry*, 2012, 33(5): 580-592.
